# Supplementary material for: Phomretones A–F, C12 polyketides from the co-cultivation of Phoma sp. YUD17001 and Armillaria sp
Source: PubMed Central journal article supplement — RSC Adv. 2020 May 13;10(31):18384–9. doi: 10.1039/d0ra02524k (PMC9053967; doi:10.1039/d0ra02524k), 2020-05-13
Supplement: RA-010-D0RA02524K-s001.pdf [file RA-010-D0RA02524K-s001.pdf]

**Electronic supplementary information**

**Phomretones A-F, C<sub>12</sub> polyketides from the co-cultivation of *Phoma* sp.**

**YUD17001 and *Armillaria* sp.**

Hong-Tao Li, Tao Liu, Ruining Yang, Fei Xie, Zhi Yang, Yabin Yang, Hao Zhou\* and Zhong-Tao Ding\*

*Key Laboratory of Functional Molecules Analysis and Biotransformation of Universities in Yunnan Province, Key Laboratory of Medicinal Chemistry for Natural Resource, Ministry of Education, School of Chemical Science and Technology, Yunnan University, Kunming 650091, China*

**Corresponding Authors**

\*E-mail: haozhou@ynu.edu.cn (H. Zhou).

\*E-mail: ztding@ynu.edu.cn (Z.-T. Ding).

## Contents

|                                                                                                                                                                                                                                                                                    |    |
|------------------------------------------------------------------------------------------------------------------------------------------------------------------------------------------------------------------------------------------------------------------------------------|----|
| <b>Table S1.</b> <sup>1</sup> H (400 MHz) and <sup>13</sup> C (100 MHz) NMR Data for phomretone A ( <b>1</b> ) and verbenanone ( $\delta$ in ppm).....                                                                                                                             | 1  |
| <b>Table S2.</b> Inhibition of <b>1-6</b> on AChE.....                                                                                                                                                                                                                             | 2  |
| <b>Table S3.</b> Inhibitory Effects of <b>1-6</b> on PTP1B Enzyme Activity.....                                                                                                                                                                                                    | 2  |
| <b>Fig. S1.</b> Inhibition (%) of compounds <b>1-6</b> was tested at 40 $\mu$ M against five human cancer cell lines (HL-60, A-549, SMMC-7721, MCF-7, and SW480).....                                                                                                              | 3  |
| <b>Fig. S2.</b> Total ion chromatograms (TIC) of ethyl acetate extracts from the co-culture of <i>Phoma</i> sp. and <i>Armillaria</i> sp. (A); TIC of ethyl acetate extracts from <i>Phoma</i> sp. YUD17001 (B); TIC of ethyl acetate extracts from <i>Armillaria</i> sp. (C)..... | 3  |
| <b>Fig. S3.</b> Total ion chromatograms (TIC) of extracts from co-culture and high-resolution extracted ion chromatogram (EIC) of four selected masses.....                                                                                                                        | 4  |
| <b>Fig. S4.</b> <sup>1</sup> H NMR spectrum of phomretone A ( <b>1</b> ) in methanol- <i>d</i> <sub>4</sub> (400 MHz).....                                                                                                                                                         | 5  |
| <b>Fig. S5.</b> <sup>13</sup> C NMR and DEPT spectrum of phomretone A ( <b>1</b> ) in methanol- <i>d</i> <sub>4</sub> (100 MHz).....                                                                                                                                               | 5  |
| <b>Fig. S6.</b> HSQC spectrum of phomretone A ( <b>1</b> ) in methanol- <i>d</i> <sub>4</sub> ( <sup>1</sup> H-400 MHz).....                                                                                                                                                       | 6  |
| <b>Fig. S7.</b> <sup>1</sup> H- <sup>1</sup> H COSY spectrum of phomretone A ( <b>1</b> ) in methanol- <i>d</i> <sub>4</sub> (400 MHz).....                                                                                                                                        | 6  |
| <b>Fig. S8.</b> HMBC spectrum of phomretone A ( <b>1</b> ) in methanol- <i>d</i> <sub>4</sub> ( <sup>1</sup> H-400 MHz).....                                                                                                                                                       | 7  |
| <b>Fig. S9.</b> ROESY spectrum of phomretone A ( <b>1</b> ) in methanol- <i>d</i> <sub>4</sub> (400 MHz).....                                                                                                                                                                      | 7  |
| <b>Fig. S10.</b> (+)-HRESIMS data of phomretone A ( <b>1</b> ).....                                                                                                                                                                                                                | 8  |
| <b>Fig. S11.</b> Ultraviolet (UV) Spectrum of phomretone A ( <b>1</b> ) in MeOH.....                                                                                                                                                                                               | 8  |
| <b>Fig. S12.</b> <sup>1</sup> H NMR spectrum of phomretone B ( <b>2</b> ) in methanol- <i>d</i> <sub>4</sub> (400 MHz).....                                                                                                                                                        | 9  |
| <b>Fig. S13.</b> <sup>13</sup> C NMR and DEPT spectrum of phomretone B ( <b>2</b> ) in methanol- <i>d</i> <sub>4</sub> (100 MHz).....                                                                                                                                              | 9  |
| <b>Fig. S14.</b> HSQC spectrum of phomretone B ( <b>2</b> ) in methanol- <i>d</i> <sub>4</sub> ( <sup>1</sup> H-400 MHz).....                                                                                                                                                      | 10 |
| <b>Fig. S15.</b> <sup>1</sup> H- <sup>1</sup> H COSY spectrum of phomretone B ( <b>2</b> ) in methanol- <i>d</i> <sub>4</sub> (400 MHz).....                                                                                                                                       | 10 |
| <b>Fig. S16.</b> HMBC spectrum of phomretone B ( <b>2</b> ) in methanol- <i>d</i> <sub>4</sub> ( <sup>1</sup> H-400 MHz).....                                                                                                                                                      | 11 |
| <b>Fig. S17.</b> ROESY spectrum of phomretone B ( <b>2</b> ) in methanol- <i>d</i> <sub>4</sub> (400 MHz).....                                                                                                                                                                     | 11 |
| <b>Fig. S18.</b> (+)-HRESIMS data of phomretone B ( <b>2</b> ).....                                                                                                                                                                                                                | 12 |
| <b>Fig. S19.</b> UV absorption spectrum of phomretone B ( <b>2</b> ) in MeOH.....                                                                                                                                                                                                  | 12 |
| <b>Fig. S20.</b> <sup>1</sup> H NMR spectrum of phomretone C ( <b>3</b> ) in methanol- <i>d</i> <sub>4</sub> (400 MHz).....                                                                                                                                                        | 13 |
| <b>Fig. S21.</b> <sup>13</sup> C NMR and DEPT spectrum of phomretone C ( <b>3</b> ) in methanol- <i>d</i> <sub>4</sub> (100 MHz).....                                                                                                                                              | 13 |
| <b>Fig. S22.</b> HSQC spectrum of phomretone C ( <b>3</b> ) in methanol- <i>d</i> <sub>4</sub> ( <sup>1</sup> H-400 MHz).....                                                                                                                                                      | 14 |
| <b>Fig. S23.</b> <sup>1</sup> H- <sup>1</sup> H COSY spectrum of phomretone C ( <b>3</b> ) in methanol- <i>d</i> <sub>4</sub> (400 MHz).....                                                                                                                                       | 14 |
| <b>Fig. S24.</b> HMBC spectrum of phomretone C ( <b>3</b> ) in methanol- <i>d</i> <sub>4</sub> ( <sup>1</sup> H-400 MHz).....                                                                                                                                                      | 15 |
| <b>Fig. S25.</b> ROESY spectrum of phomretone C ( <b>3</b> ) in methanol- <i>d</i> <sub>4</sub> (400 MHz).....                                                                                                                                                                     | 15 |
| <b>Fig. S26.</b> (+)-HRESIMS data of phomretone C ( <b>3</b> ).....                                                                                                                                                                                                                | 16 |
| <b>Fig. S27.</b> UV absorption spectrum of phomretone C ( <b>3</b> ) in MeOH.....                                                                                                                                                                                                  | 16 |
| <b>Fig. S28.</b> <sup>1</sup> H NMR spectrum of phomretone D ( <b>4</b> ) in methanol- <i>d</i> <sub>4</sub> (400 MHz).....                                                                                                                                                        | 17 |
| <b>Fig. S29.</b> <sup>13</sup> C NMR and DEPT spectrum of phomretone D ( <b>4</b> ) in methanol- <i>d</i> <sub>4</sub> (100 MHz).....                                                                                                                                              | 17 |
| <b>Fig. S30.</b> HSQC spectrum of phomretone D ( <b>4</b> ) in methanol- <i>d</i> <sub>4</sub> ( <sup>1</sup> H-400 MHz).....                                                                                                                                                      | 18 |
| <b>Fig. S31.</b> <sup>1</sup> H- <sup>1</sup> H COSY spectrum of phomretone D ( <b>4</b> ) in methanol- <i>d</i> <sub>4</sub> (400 MHz).....                                                                                                                                       | 18 |
| <b>Fig. S32.</b> HMBC spectrum of phomretone D ( <b>4</b> ) in methanol- <i>d</i> <sub>4</sub> ( <sup>1</sup> H-400 MHz).....                                                                                                                                                      | 19 |
| <b>Fig. S33.</b> ROESY spectrum of phomretone D ( <b>4</b> ) in methanol- <i>d</i> <sub>4</sub> (400 MHz).....                                                                                                                                                                     | 19 |
| <b>Fig. S34.</b> (+)-HRESIMS data of phomretone D ( <b>4</b> ).....                                                                                                                                                                                                                | 20 |
| <b>Fig. S35.</b> UV absorption spectrum of phomretone D ( <b>4</b> ) in MeOH.....                                                                                                                                                                                                  | 20 |

|                                                                                                                           |    |
|---------------------------------------------------------------------------------------------------------------------------|----|
| <b>Fig. S36.</b> $^1\text{H}$ NMR spectrum of phomretone E ( <b>5</b> ) in methanol- $d_4$ (400 MHz).....                 | 21 |
| <b>Fig. S37.</b> $^{13}\text{C}$ NMR and DEPT spectrum of phomretone E ( <b>5</b> ) in methanol- $d_4$ (100 MHz).....     | 21 |
| <b>Fig. S38.</b> HSQC spectrum of phomretone E ( <b>5</b> ) in methanol- $d_4$ ( $^1\text{H}$ -400 MHz).....              | 22 |
| <b>Fig. S39.</b> $^1\text{H}$ - $^1\text{H}$ COSY spectrum of phomretone E ( <b>5</b> ) in methanol- $d_4$ (400 MHz)..... | 22 |
| <b>Fig. S40.</b> HMBC spectrum of phomretone E ( <b>5</b> ) in methanol- $d_4$ ( $^1\text{H}$ -400 MHz).....              | 23 |
| <b>Fig. S41.</b> ROESY spectrum of phomretone E ( <b>5</b> ) in methanol- $d_4$ (400 MHz).....                            | 23 |
| <b>Fig. S42.</b> (+)-HRESIMS data of phomretone E ( <b>5</b> ).....                                                       | 24 |
| <b>Fig. S43.</b> UV absorption spectrum of phomretone E ( <b>5</b> ) in MeOH.....                                         | 24 |
| <b>Fig. S44.</b> $^1\text{H}$ NMR spectrum of phomretone F ( <b>6</b> ) in methanol- $d_4$ (400 MHz).....                 | 25 |
| <b>Fig. S45.</b> $^{13}\text{C}$ NMR and DEPT spectrum of phomretone F ( <b>6</b> ) in methanol- $d_4$ (100 MHz).....     | 25 |
| <b>Fig. S46.</b> HSQC spectrum of phomretone F ( <b>6</b> ) in methanol- $d_4$ ( $^1\text{H}$ -400 MHz).....              | 26 |
| <b>Fig. S47.</b> $^1\text{H}$ - $^1\text{H}$ COSY spectrum of phomretone F ( <b>6</b> ) in methanol- $d_4$ (400 MHz)..... | 26 |
| <b>Fig. S48.</b> HMBC spectrum of phomretone F ( <b>6</b> ) in methanol- $d_4$ ( $^1\text{H}$ -400 MHz).....              | 27 |
| <b>Fig. S49.</b> ROESY spectrum of phomretone F ( <b>6</b> ) in methanol- $d_4$ (400 MHz).....                            | 27 |
| <b>Fig. S50.</b> (+)-HRESIMS data of phomretone F ( <b>6</b> ).....                                                       | 28 |
| <b>Fig. S51.</b> UV absorption spectrum of phomretone F ( <b>6</b> ) in MeOH.....                                         | 28 |
| <b>References</b> .....                                                                                                   | 29 |

**Table S1**  $^1\text{H}$  (400 MHz) and  $^{13}\text{C}$  (100 MHz) NMR data for phomretone A (**1**) and verbenanone<sup>a1</sup> ( $\delta$  in ppm)

| phomretone A ( <b>1</b> ) <sup>a</sup> |                                  |                            | verbenanone <sup>a1</sup>        |                            |
|----------------------------------------|----------------------------------|----------------------------|----------------------------------|----------------------------|
| no.                                    | $\delta_{\text{H}}$ ( $J$ in Hz) | $\delta_{\text{C}}$ , type | $\delta_{\text{H}}$ ( $J$ in Hz) | $\delta_{\text{C}}$ , type |
| 1                                      |                                  | 208.4, C                   |                                  | 212.4, C                   |
| 2                                      | 4.16, dd (12.4, 6.8)             | 75.7, CH                   | 4.24, dd (12.0, 6.7)             | 76.5, CH                   |
| 3                                      | 2.22, m                          | 30.8, CH <sub>2</sub>      | 1.90, m                          | 32.8, CH <sub>2</sub>      |
|                                        | 1.47, overlap                    |                            | 2.14, m                          |                            |
| 4                                      | 2.13, m                          | 29.7, CH <sub>2</sub>      | 2.03, m                          | 29.2, CH <sub>2</sub>      |
|                                        | 1.79, m                          |                            |                                  |                            |
| 5                                      | 3.79, dt (10.8, 4.0)             | 74.7, CH                   | 3.97, d (2.6)                    | 79.4, CH                   |
| 6                                      | 2.48, d (10.8)                   | 57.5, CH                   | 3.15, br s                       | 55.2, CH                   |
| 7                                      | 4.35, br s                       | 66.9, CH                   | 3.49, dd (9.3, 5.0)              | 75.6, CH                   |
| 8                                      | 3.14, dd (9.6, 2.4)              | 73.2, CH                   | 3.63, dd (9.3, 9.3)              | 72.7, CH                   |
| 9                                      | 3.54, m                          | 76.4, CH                   | 3.08, ddd (11.7, 9.3, 2.6)       | 81.9, CH                   |
| 10                                     | 1.79, overlap                    | 35.2, CH <sub>2</sub>      | 1.38, m                          | 35.3, CH <sub>2</sub>      |
|                                        | 1.37, overlap                    |                            | 1.78, m                          |                            |
| 11                                     | 1.57, overlap                    | 19.6, CH <sub>2</sub>      | 1.35, m                          | 19.7, CH <sub>2</sub>      |
|                                        | 1.36, overlap                    |                            | 1.49, m                          |                            |
| 12                                     | 0.93, t (7.2)                    | 14.5, CH <sub>3</sub>      | 0.92, t (7.2)                    | 14.6, CH <sub>3</sub>      |

<sup>a</sup>Measured in methanol-*d*<sub>4</sub>.

### Bioactivities test of compounds 1-6

Phomretones A-F (**1-6**) were subjected to cytotoxicity bioassays utilizing the MTS way method. None of them showed notable inhibitory activity at the concentration of 40  $\mu\text{M}$  in the tested cytotoxicity assays against human promyelocytic leukemia (HL-60), hepatoma (SMMC-7721), non-small-cell lung cancer (A-549), breast cancer (MCF-7), and colorectal carcinoma (SW480) cell lines (Fig. S1). These compounds were also evaluated by their acetylcholinesterase inhibitory activity, however, they were found to be inactive (Table S2). Furthermore, when tested protein tyrosine phosphatase 1B (PTP1B) inhibitory activity was tested, **1-6** were not determined to be active (Table S3).

**Table S2** Inhibition of **1-6** on AChE

| compound              | Inhibition (%) <sup>a</sup> |
|-----------------------|-----------------------------|
| Tacrineb <sup>b</sup> | 58.85 $\pm$ 0.03            |
| <b>1</b>              | 23.16 $\pm$ 1.20            |
| <b>2</b>              | 20.43 $\pm$ 0.49            |
| <b>3</b>              | 21.14 $\pm$ 0.36            |
| <b>4</b>              | 20.69 $\pm$ 1.44            |
| <b>5</b>              | 22.39 $\pm$ 0.77            |
| <b>6</b>              | 21.86 $\pm$ 0.62            |

<sup>a</sup>Tested at 50  $\mu\text{M}$ ; <sup>b</sup>Positive control.

**Table S3** Inhibitory effects of **1-6** on PTP1B enzyme activity

| compound             | Inhibition (%) <sup>a</sup> |
|----------------------|-----------------------------|
| Suramin <sup>b</sup> | 77.05 $\pm$ 1.03            |
| <b>1</b>             | 7.10 $\pm$ 1.51             |
| <b>2</b>             | 19.20 $\pm$ 3.51            |
| <b>3</b>             | 9.11 $\pm$ 0.03             |
| <b>4</b>             | 0.95 $\pm$ 0.72             |
| <b>5</b>             | 4.81 $\pm$ 3.73             |
| <b>6</b>             | 10.23 $\pm$ 1.64            |

<sup>a</sup>Tested at 50  $\mu\text{M}$ ; <sup>b</sup>Positive control.

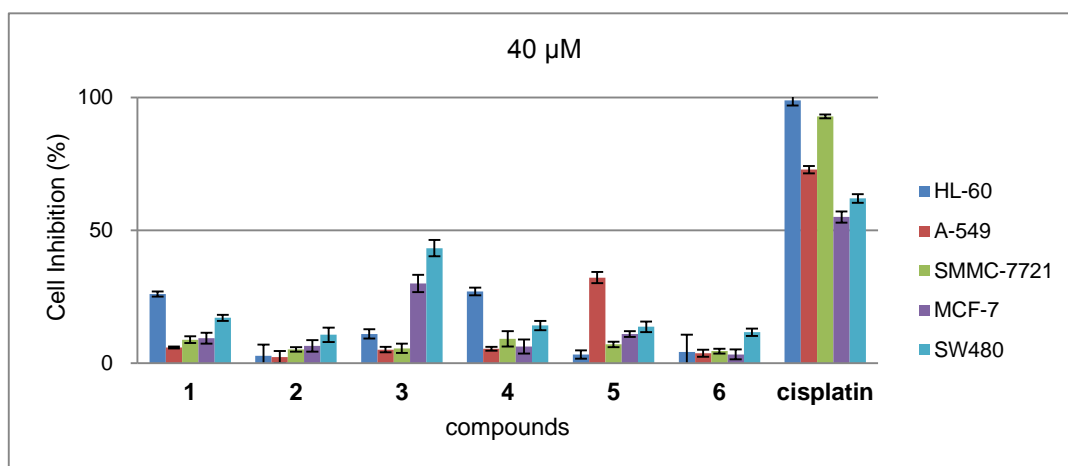

**Fig. S1** Inhibition (%) of compounds **1-6** was tested at 40  $\mu$ M against five human cancer cell lines (HL-60, A-549, SMMC-7721, MCF-7, and SW480).

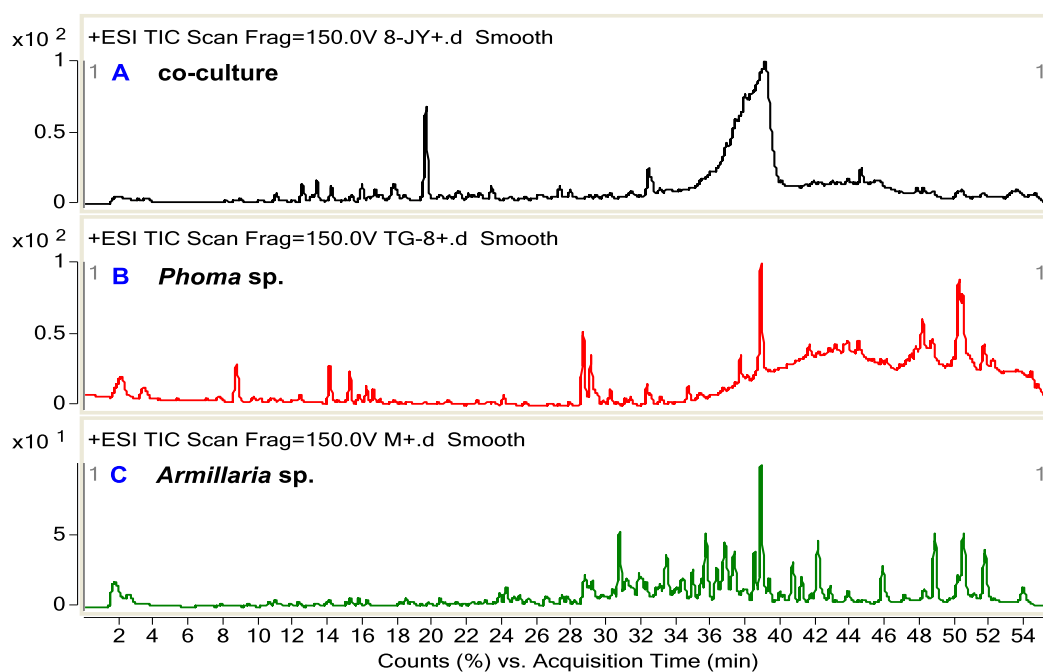

**Fig. S2** Total ion chromatograms (TIC) of ethyl acetate extracts from the co-culture of *Phoma* sp. and *Armillaria* sp. (A); TIC of ethyl acetate extracts from *Phoma* sp. YUD17001 (B); TIC of ethyl acetate extracts from *Armillaria* sp. (C).

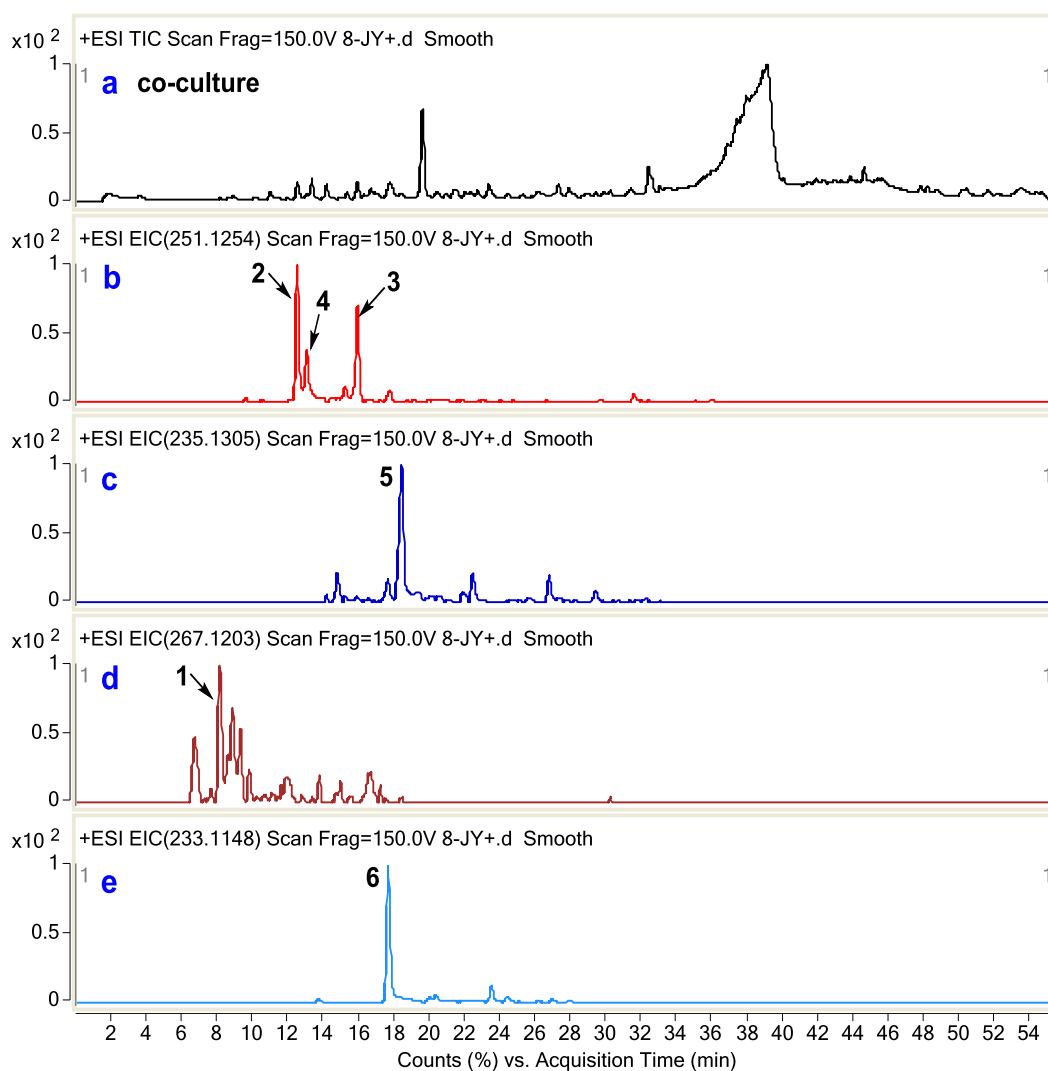

**Fig. S3** Total ion chromatograms (TIC) of extracts from co-culture and high-resolution extracted ion chromatogram (EIC) of four selected masses. (TIC (positive) of the extracts from co-culture (a); EIC of compounds **2-4** at  $m/z$  251.1254  $[M + Na]^+$  in the extracts of co-culture (b); EIC of compound **5** at  $m/z$  235.1305  $[M + Na]^+$  in the extracts of co-culture (c); EIC of compound **1** at  $m/z$  267.1203  $[M + Na]^+$  in the extracts of co-culture (d); EIC of compound **6** at  $m/z$  233.1148  $[M + Na]^+$  in the extracts of co-culture (e)).

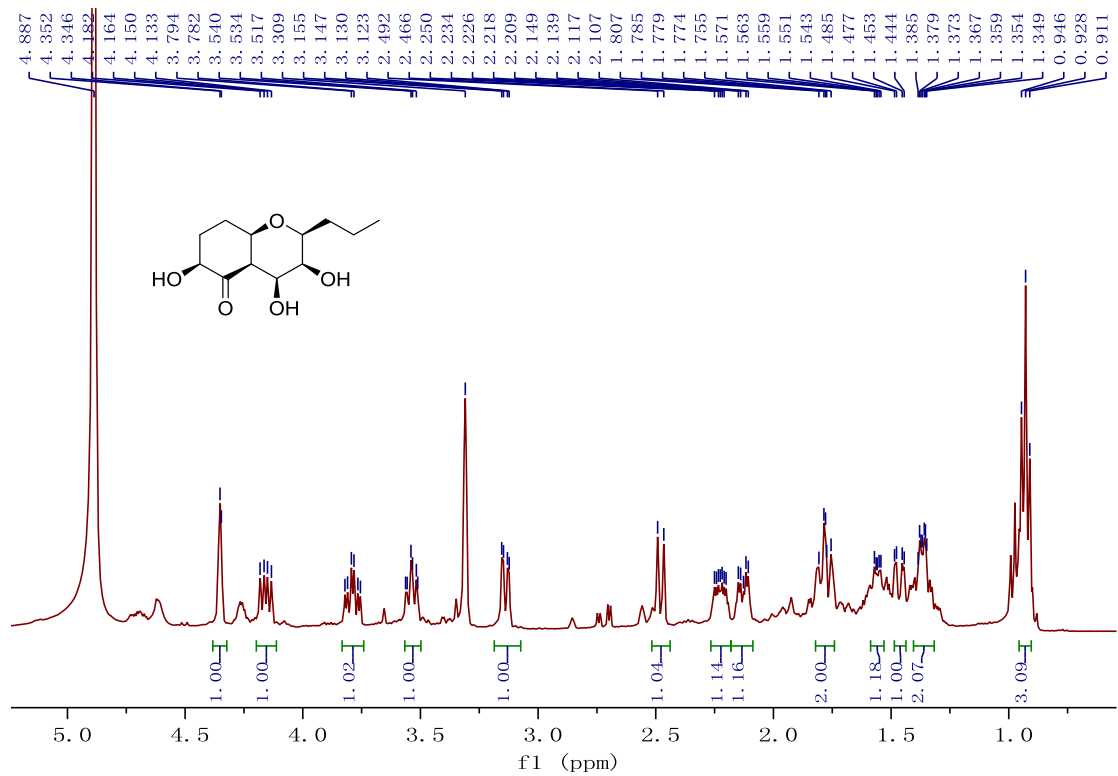

**Fig. S4** <sup>1</sup>H NMR spectrum of phomretone A (**1**) in methanol-d<sub>4</sub> (400 MHz).

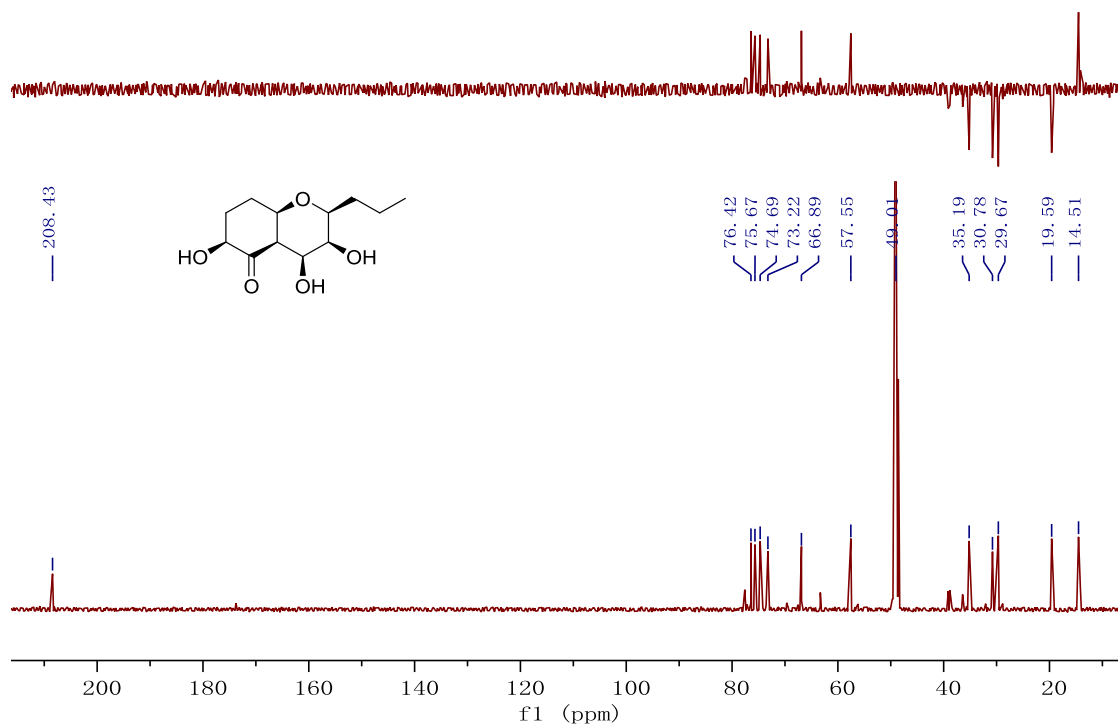

**Fig. S5** <sup>13</sup>C NMR and DEPT spectrum of phomretone A (**1**) in methanol-d<sub>4</sub> (100 MHz).



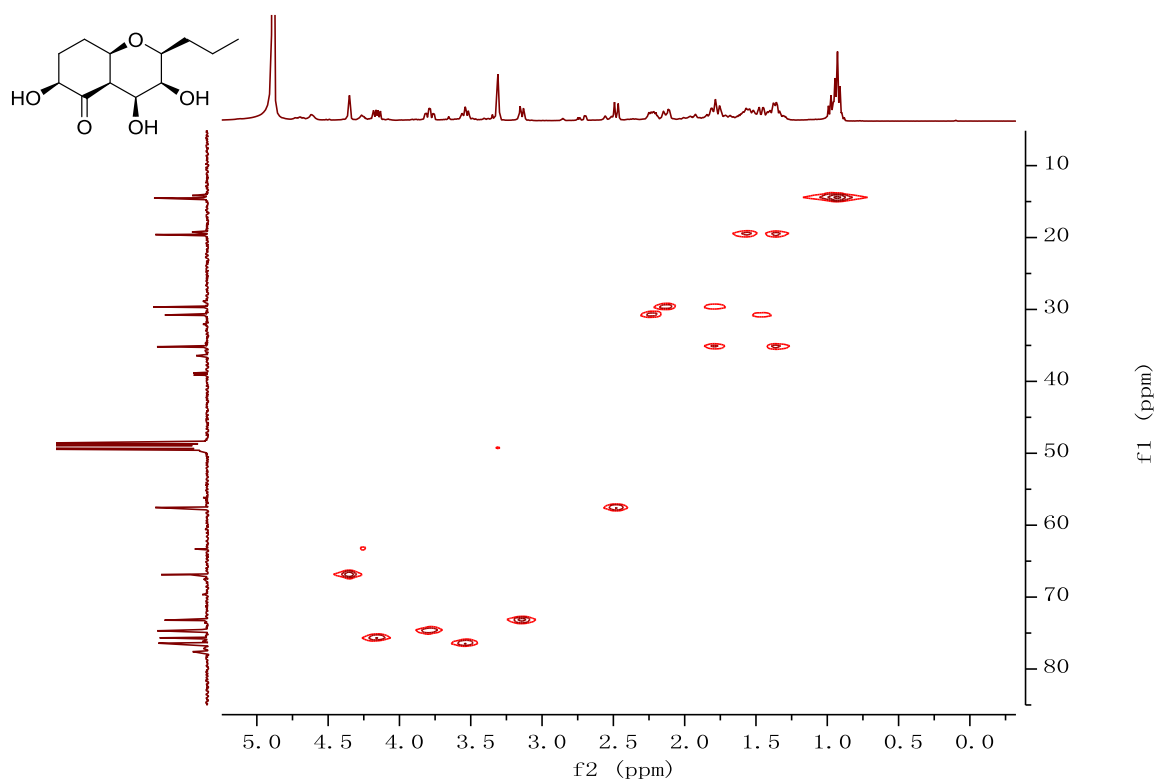

**Fig. S6.** HSQC spectrum of phomretone A (**1**) in methanol- $d_4$  ( $^1\text{H}$ -400 MHz).

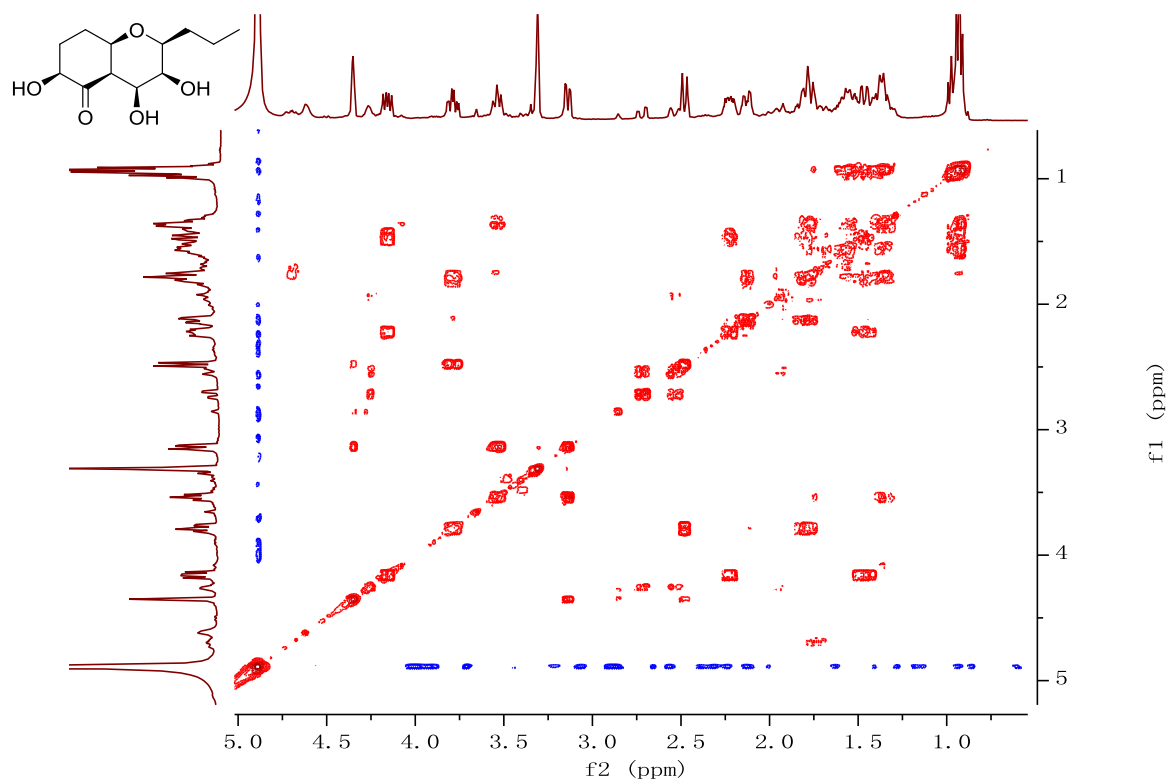

**Fig. S7.**  $^1\text{H}$ - $^1\text{H}$  COSY spectrum of phomretone A (**1**) in methanol- $d_4$  (400 MHz).

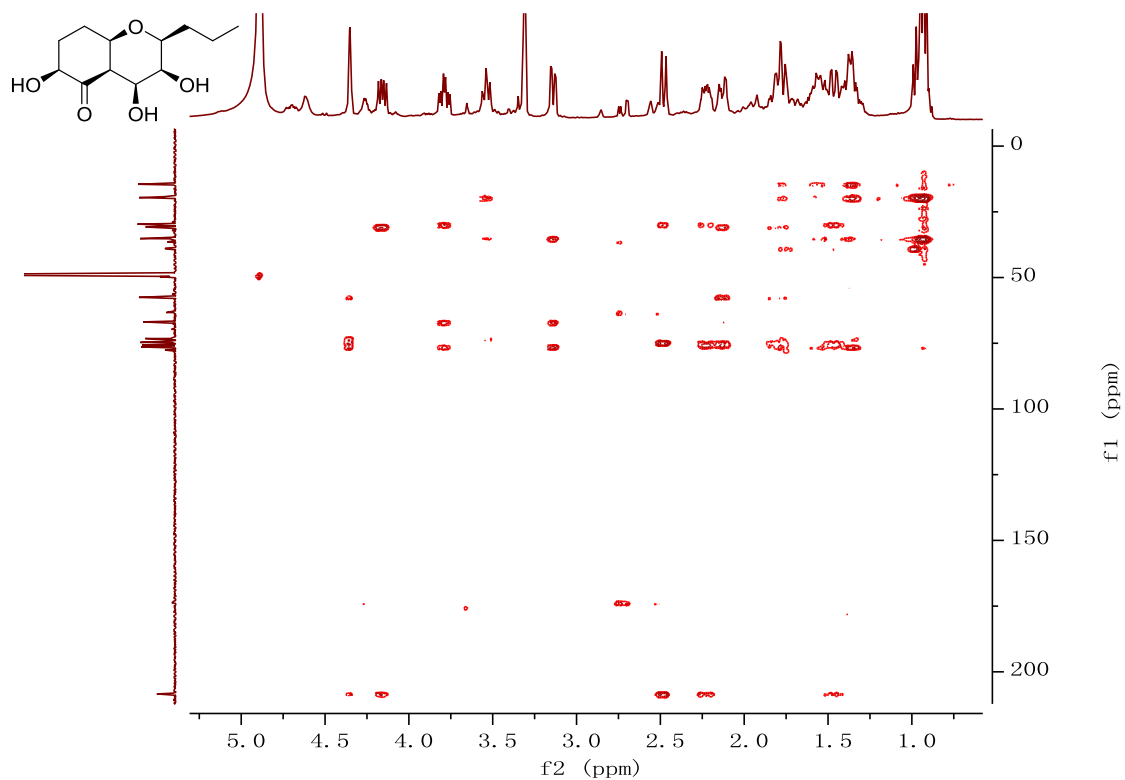

**Fig. S8.** HMBC spectrum of phomretone A (**1**) in methanol- $d_4$  ( $^1\text{H}$ -400 MHz).

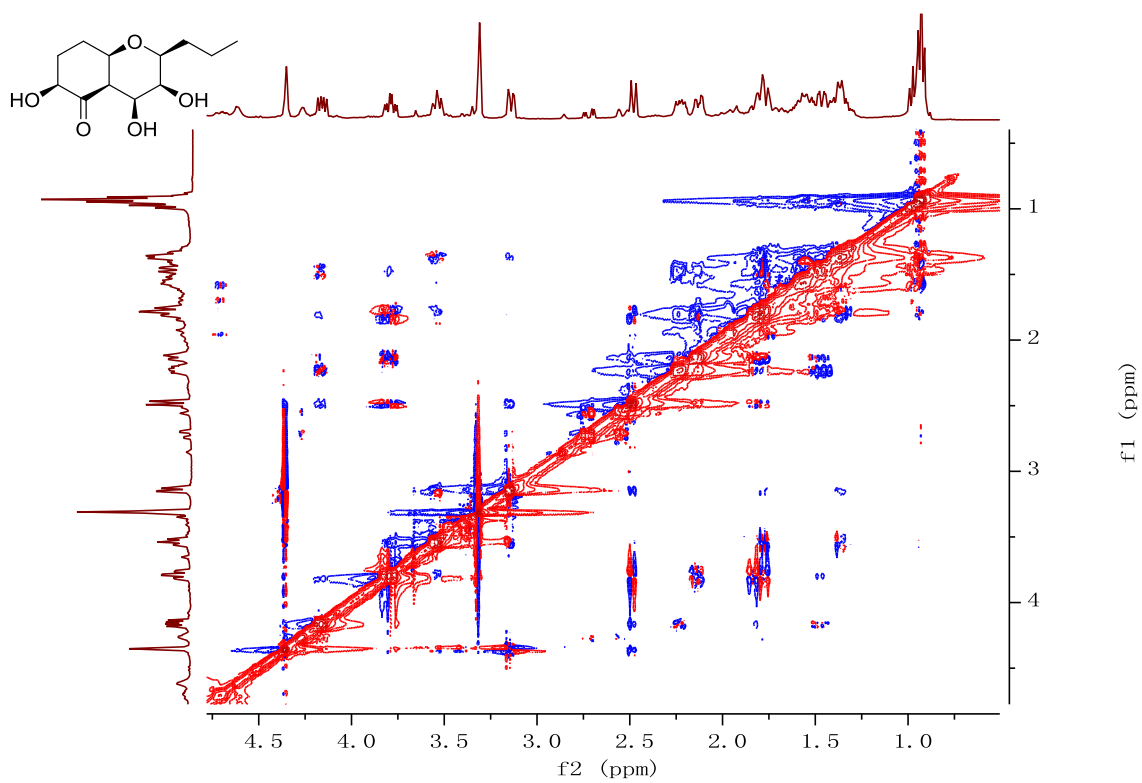

**Fig. S9.** ROESY spectrum of phomretone A (**1**) in methanol- $d_4$  (400 MHz).

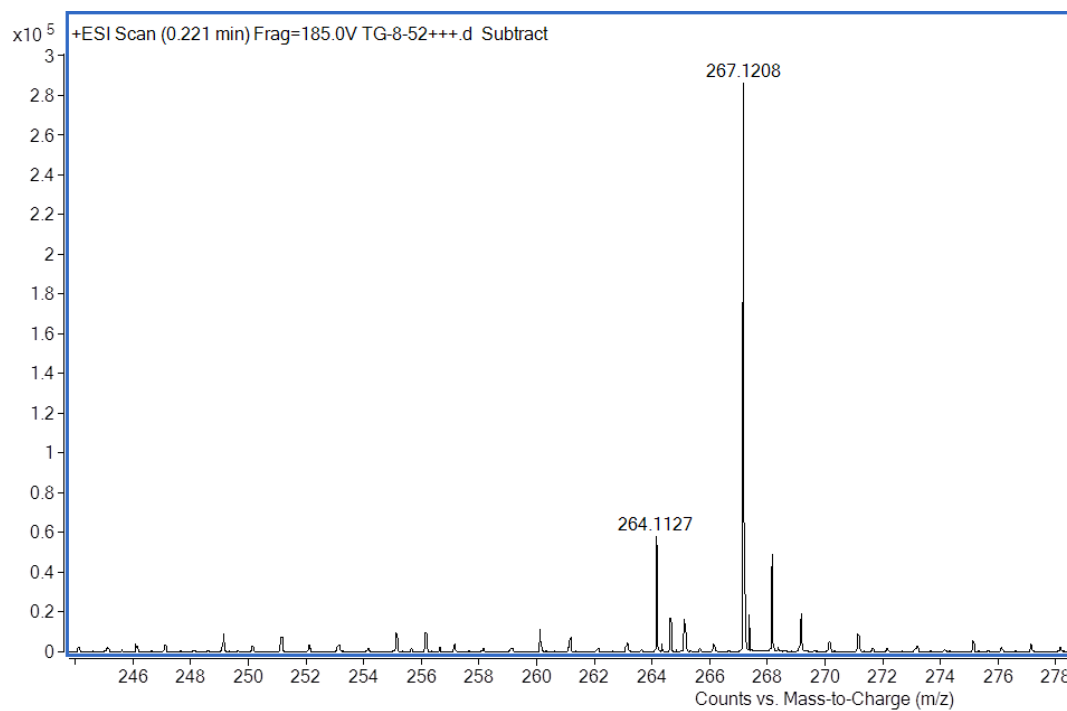

**Fig. S10.** (+)-HRESIMS data of phomretone A (**1**).

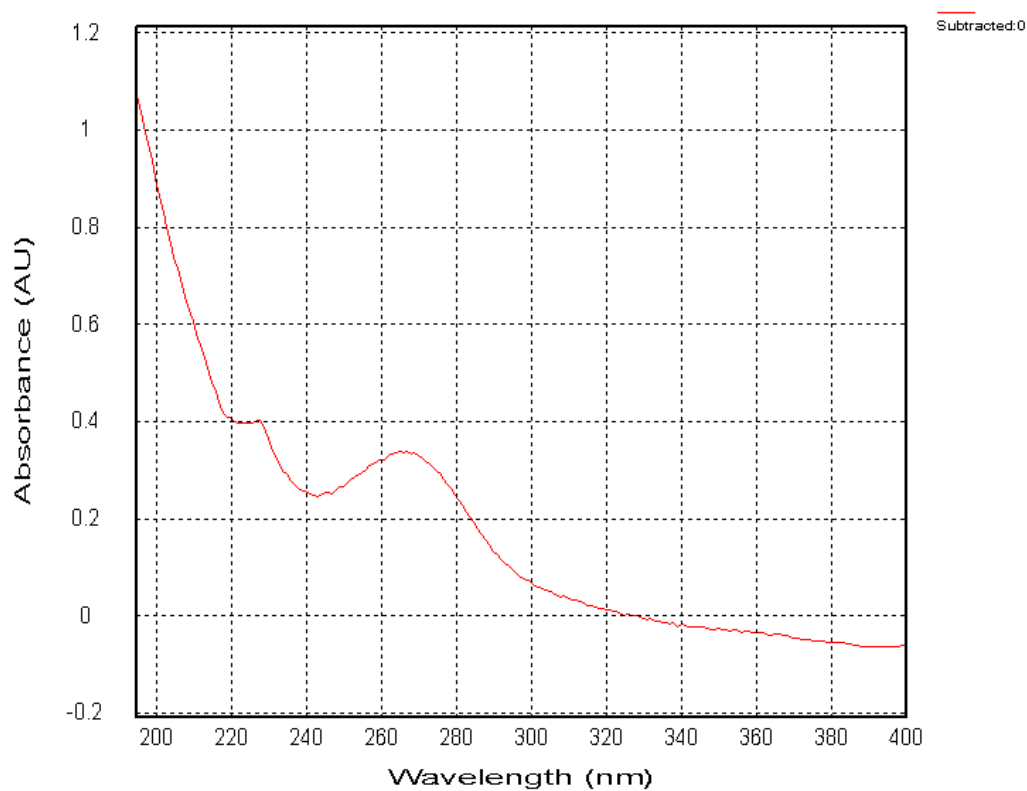

**Fig. S11.** Ultraviolet (UV) Spectrum of phomretone A (**1**) in MeOH.

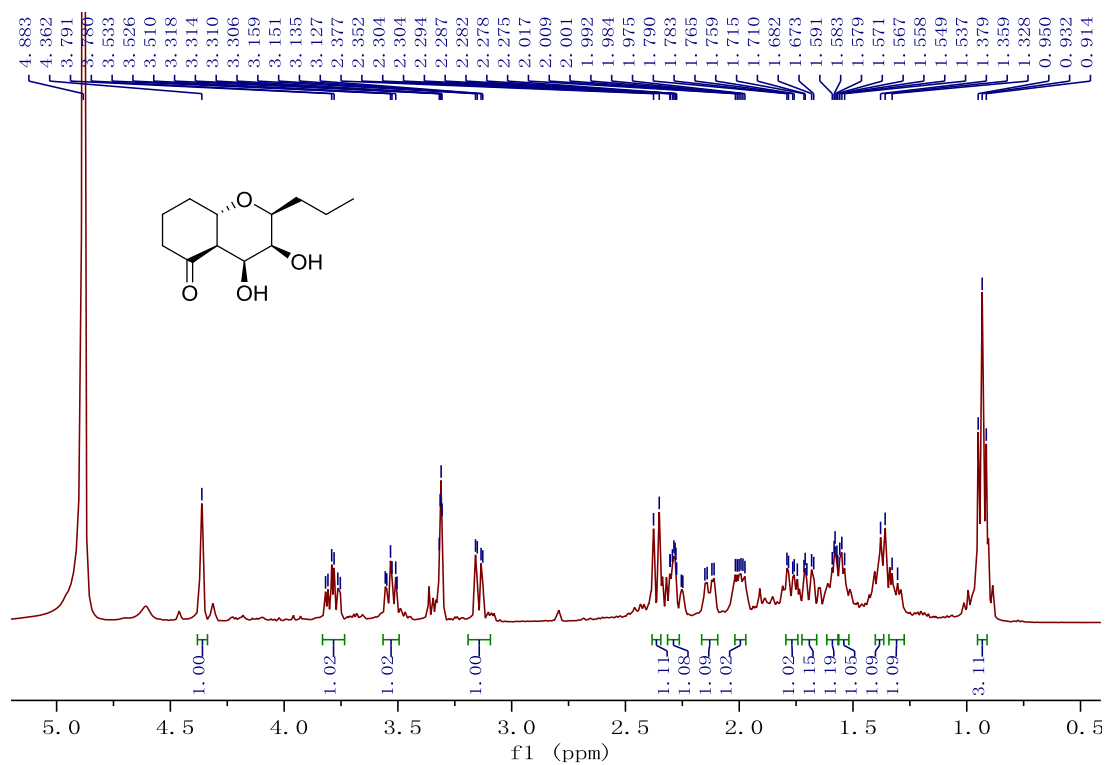

**Fig. S12.** <sup>1</sup>H NMR spectrum of phomretone B (**2**) in methanol-*d*<sub>4</sub> (400 MHz).

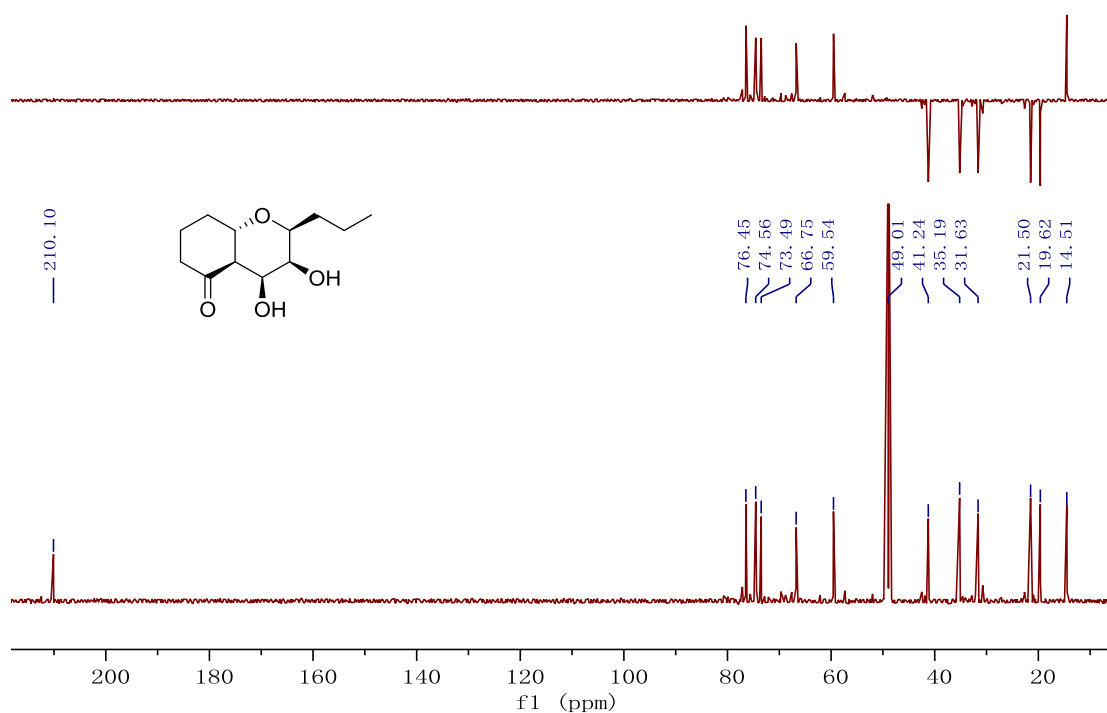

**Fig. S13.** <sup>13</sup>C NMR and DEPT spectrum of phomretone B (**2**) in methanol-*d*<sub>4</sub> (100 MHz).

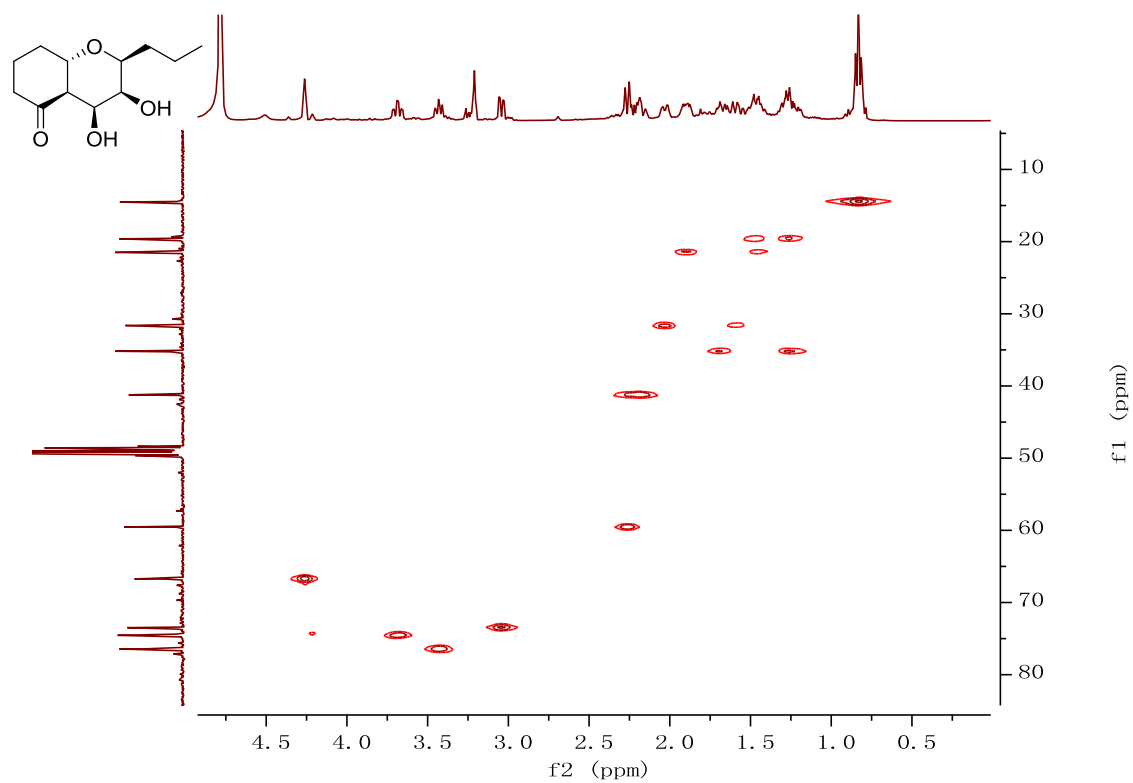

**Fig. S14.** HSQC spectrum of phomretone B (**2**) in methanol- $d_4$  ( $^1\text{H}$ -400 MHz).

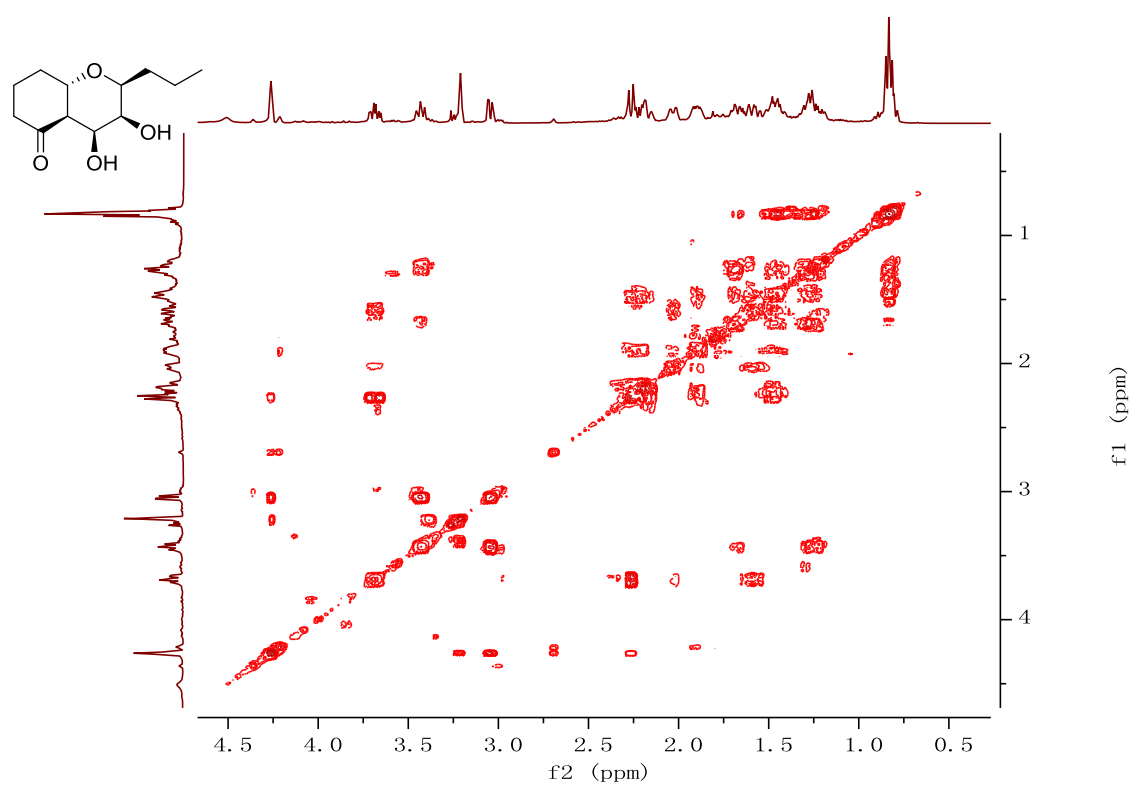

**Fig. S15.**  $^1\text{H}$ - $^1\text{H}$  COSY spectrum of phomretone B (**2**) in methanol- $d_4$  (400 MHz).

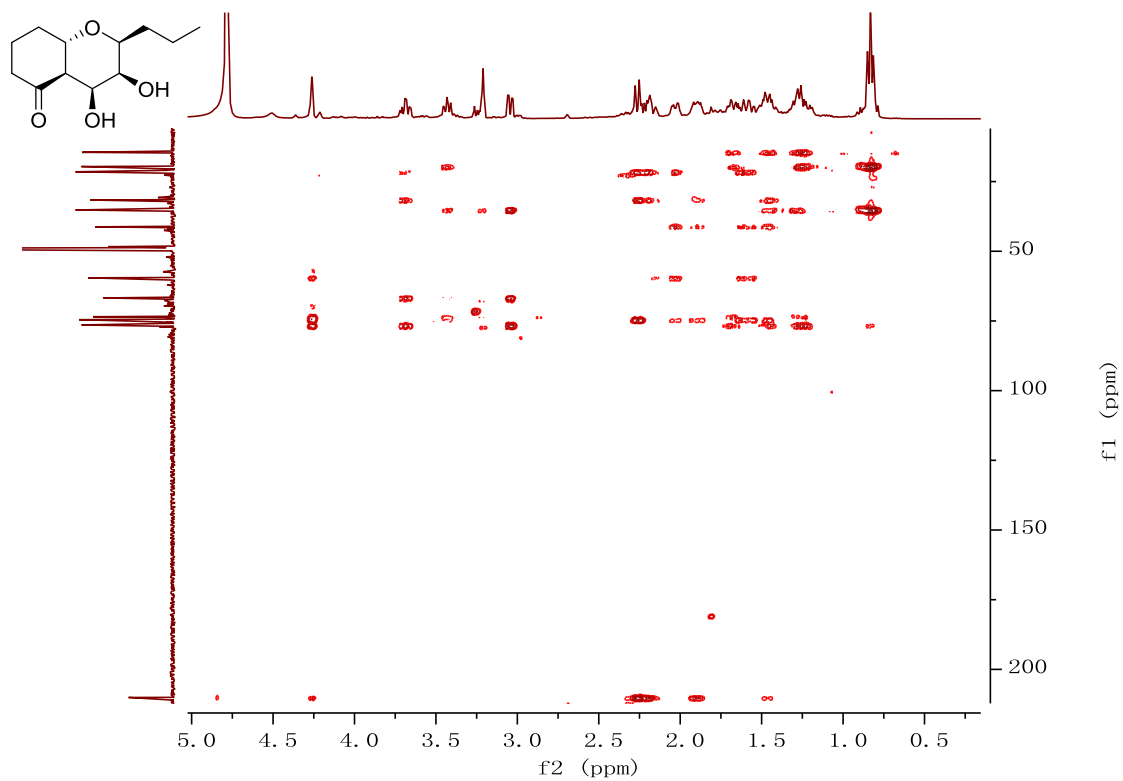

**Fig. S16.** HMBC spectrum of phomretone B (**2**) in methanol- $d_4$  ( $^1\text{H}$ -400 MHz).

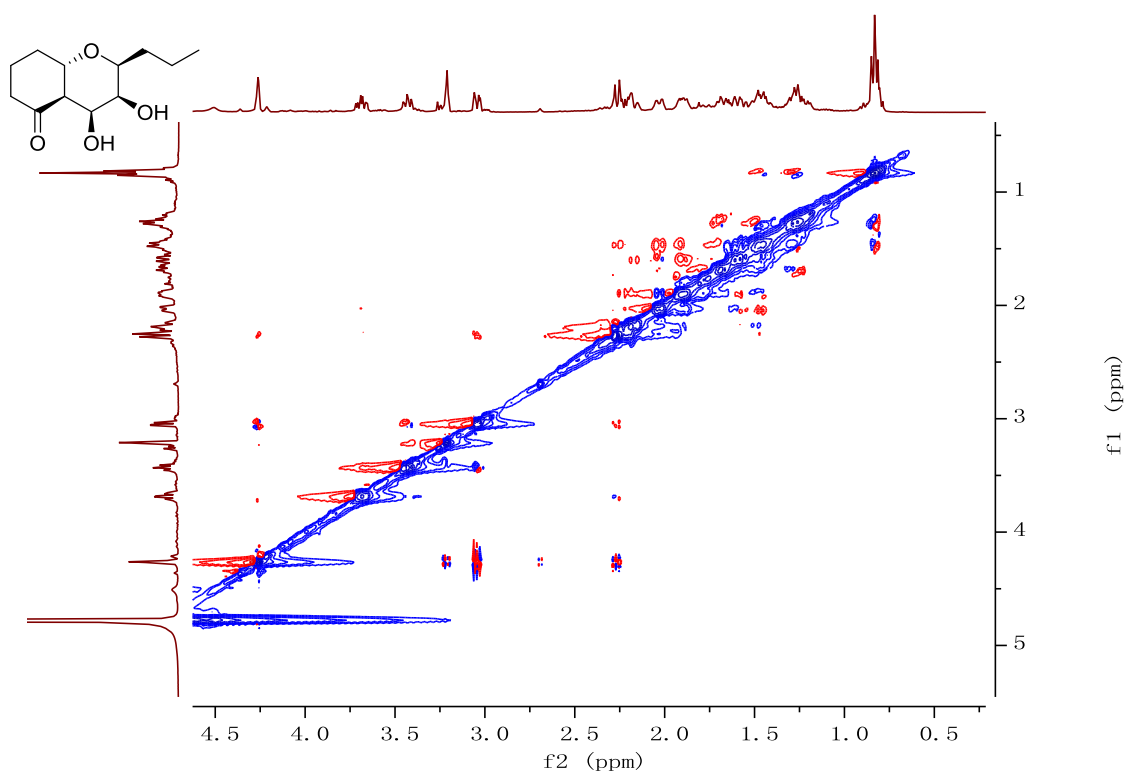

**Fig. S17.** ROESY spectrum of phomretone B (**2**) in methanol- $d_4$  (400 MHz).

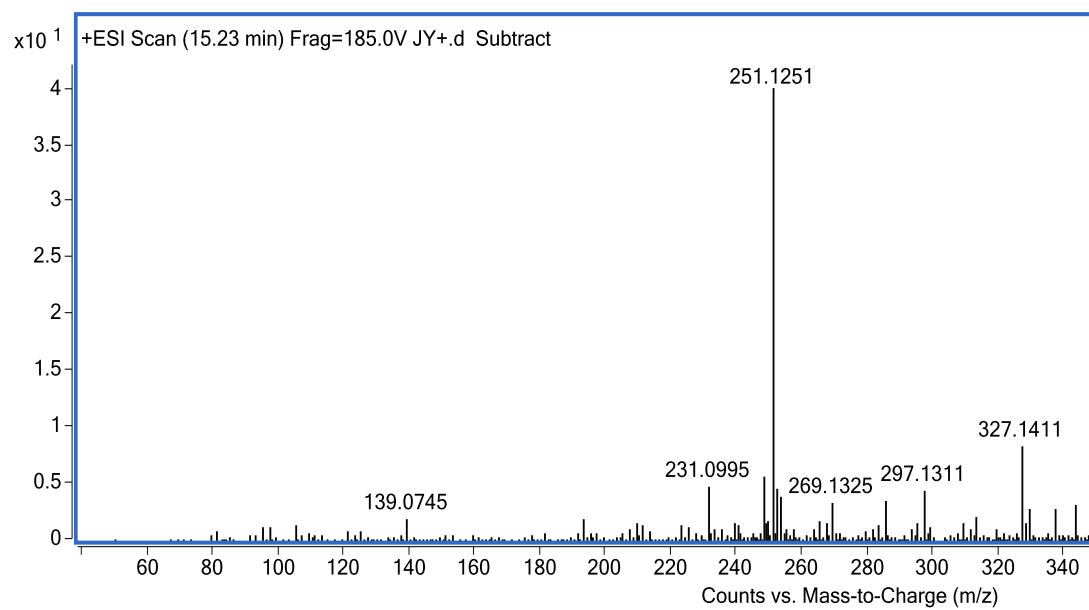

**Fig. S18.** (+)-HRESIMS data of phomretone B (**2**).

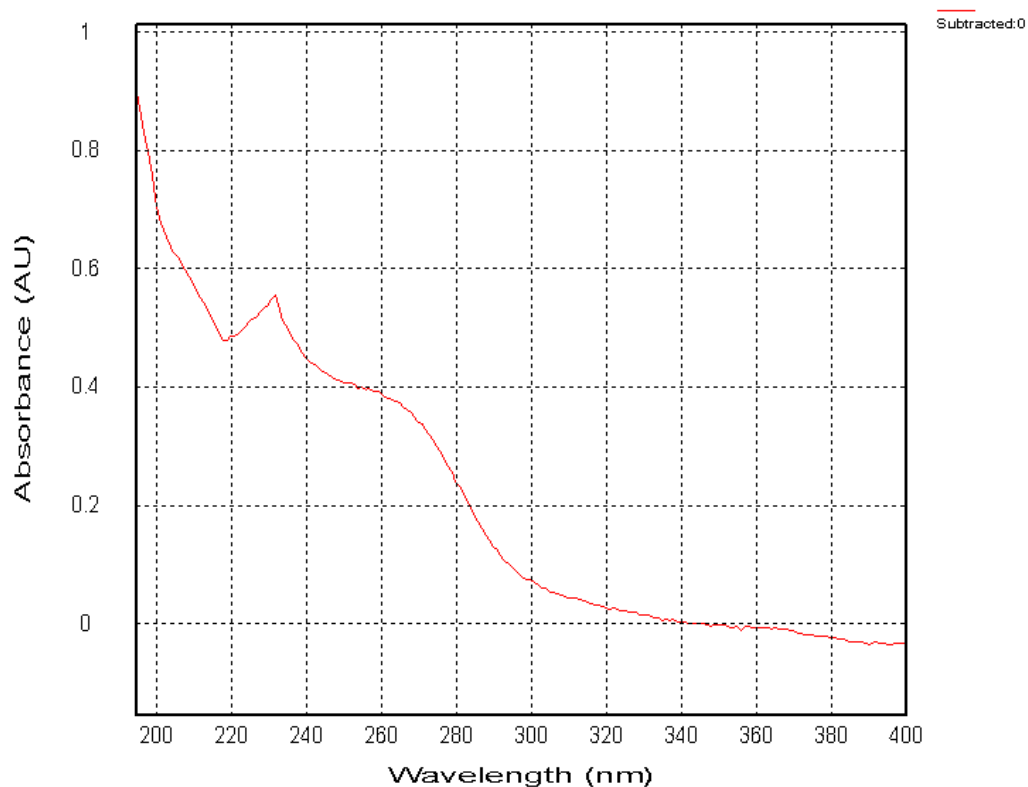

**Fig. S19.** UV absorption spectrum of phomretone B (**2**) in MeOH.

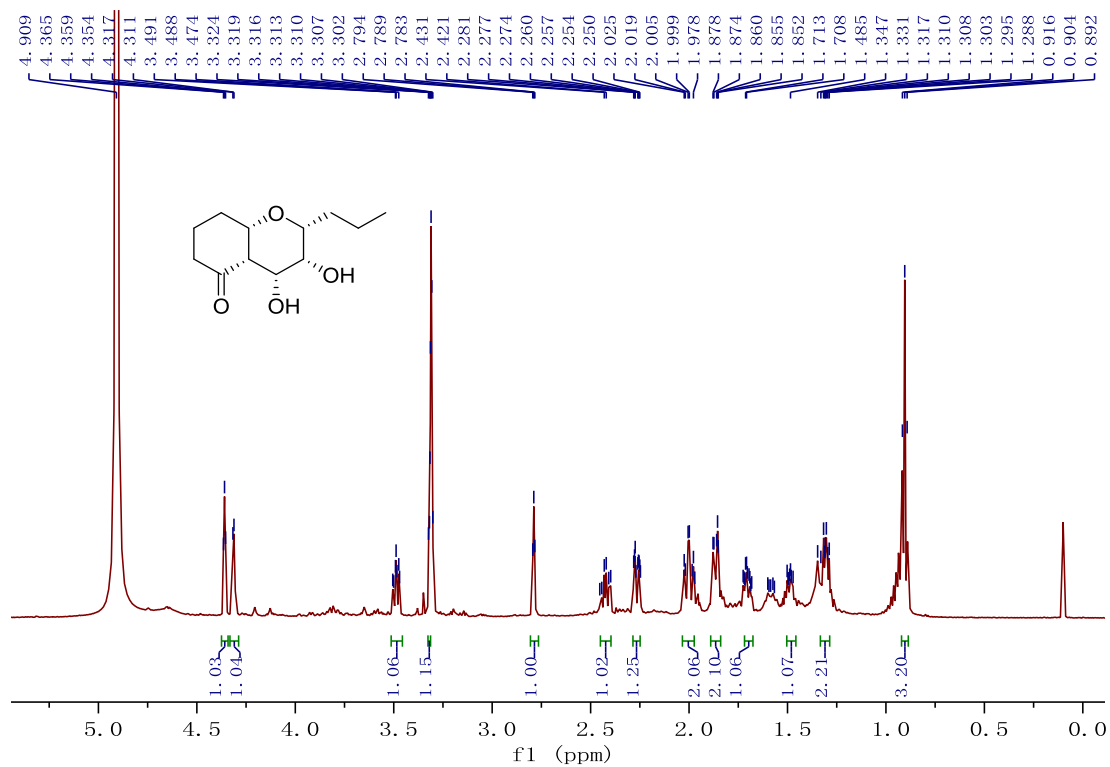

**Fig. S20.**  $^1\text{H}$  NMR spectrum of phomretone C (**3**) in methanol- $d_4$  (400 MHz).

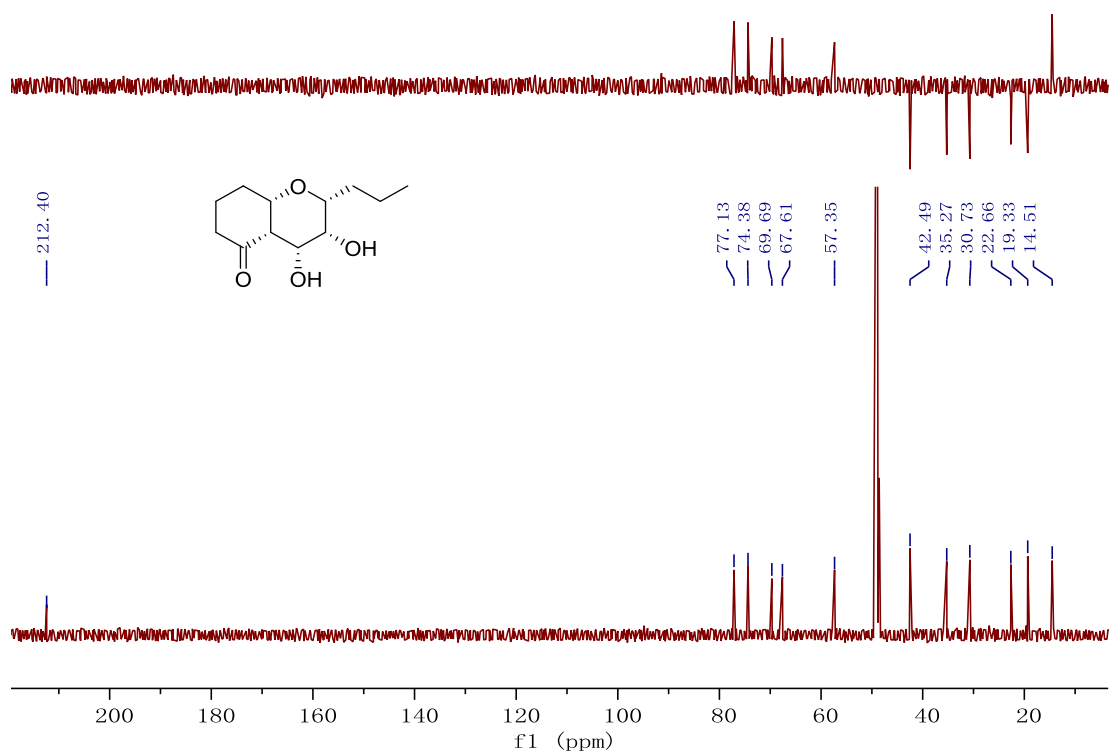

**Fig. S21.**  $^{13}\text{C}$  NMR and DEPT spectrum of phomretone C (**3**) in methanol- $d_4$  (100 MHz).



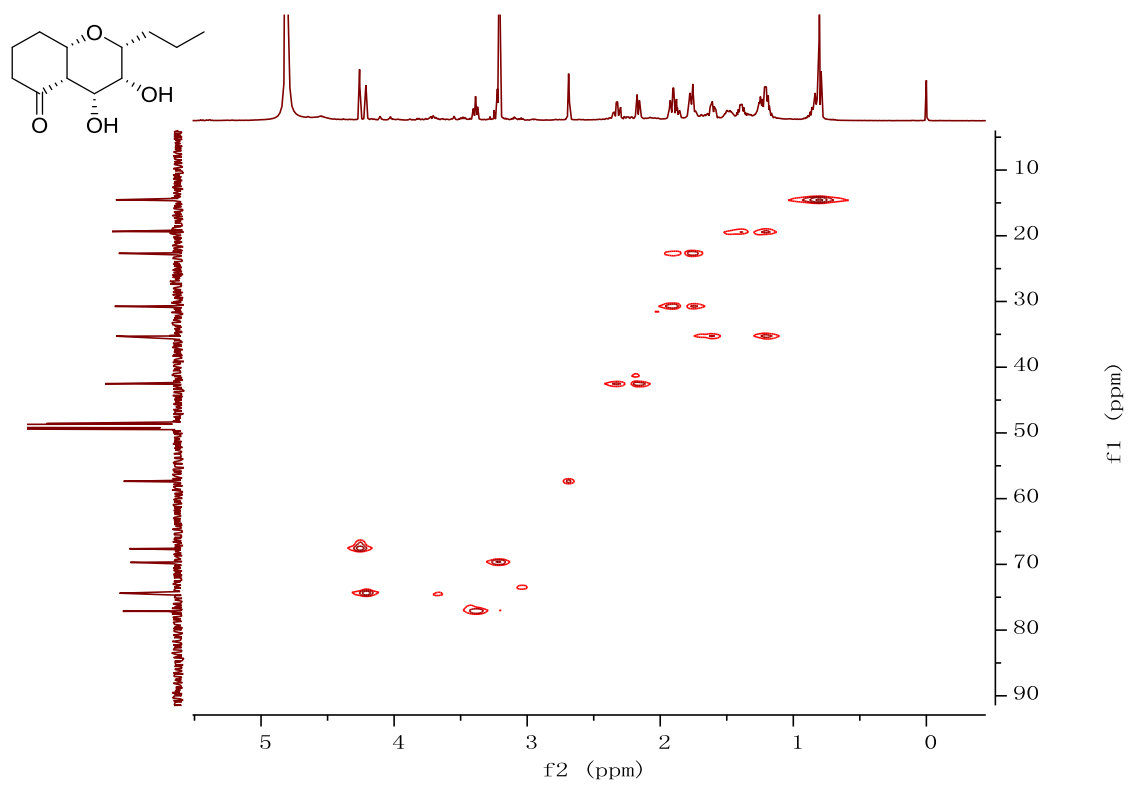

**Fig. S22.** HSQC spectrum of phomretone C (**3**) in methanol- $d_4$  ( $^1\text{H}$ -400 MHz).

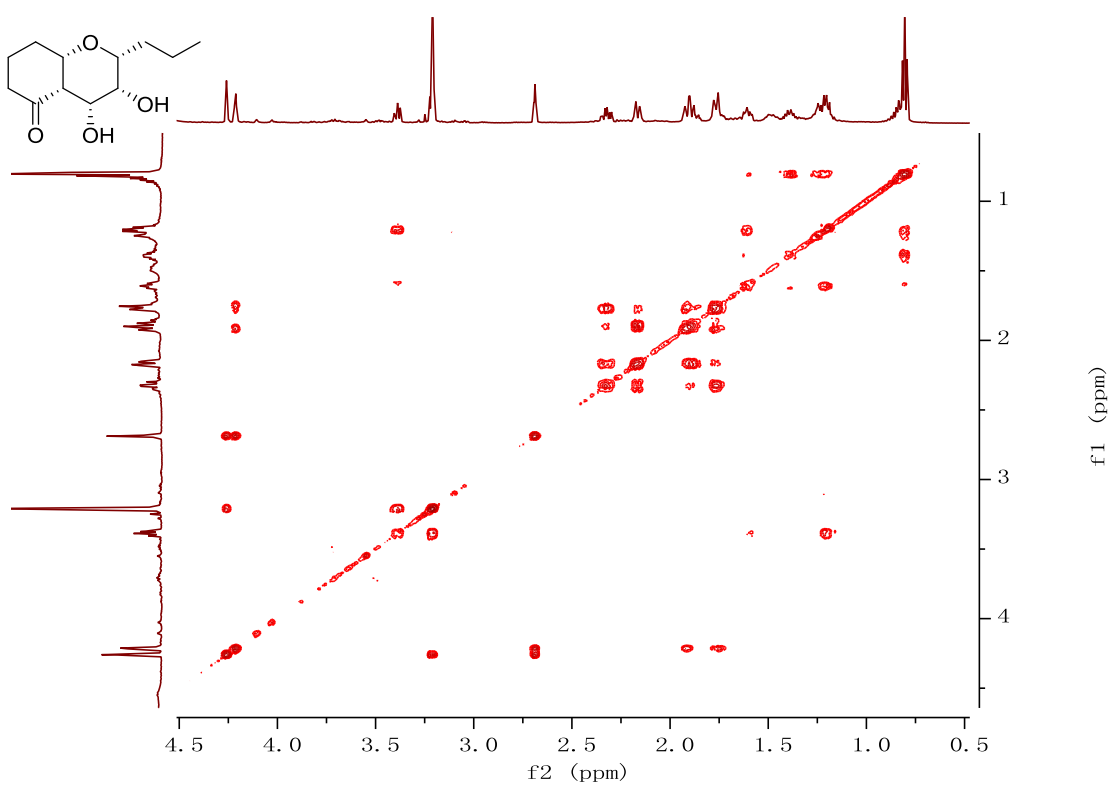

**Fig. S23.**  $^1\text{H}$ - $^1\text{H}$  COSY spectrum of phomretone C (**3**) in methanol- $d_4$  (400 MHz).

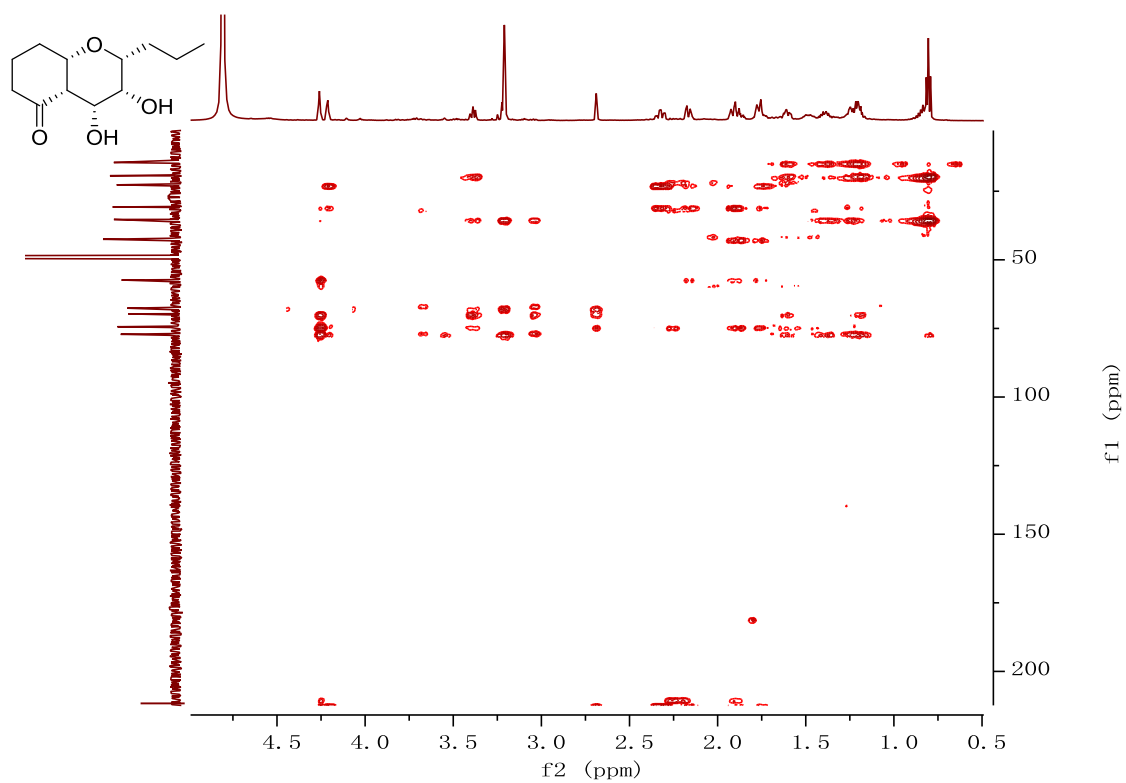

**Fig. S24.** HMBC spectrum of phomretone C (**3**) in methanol- $d_4$  ( $^1\text{H}$ -400 MHz).

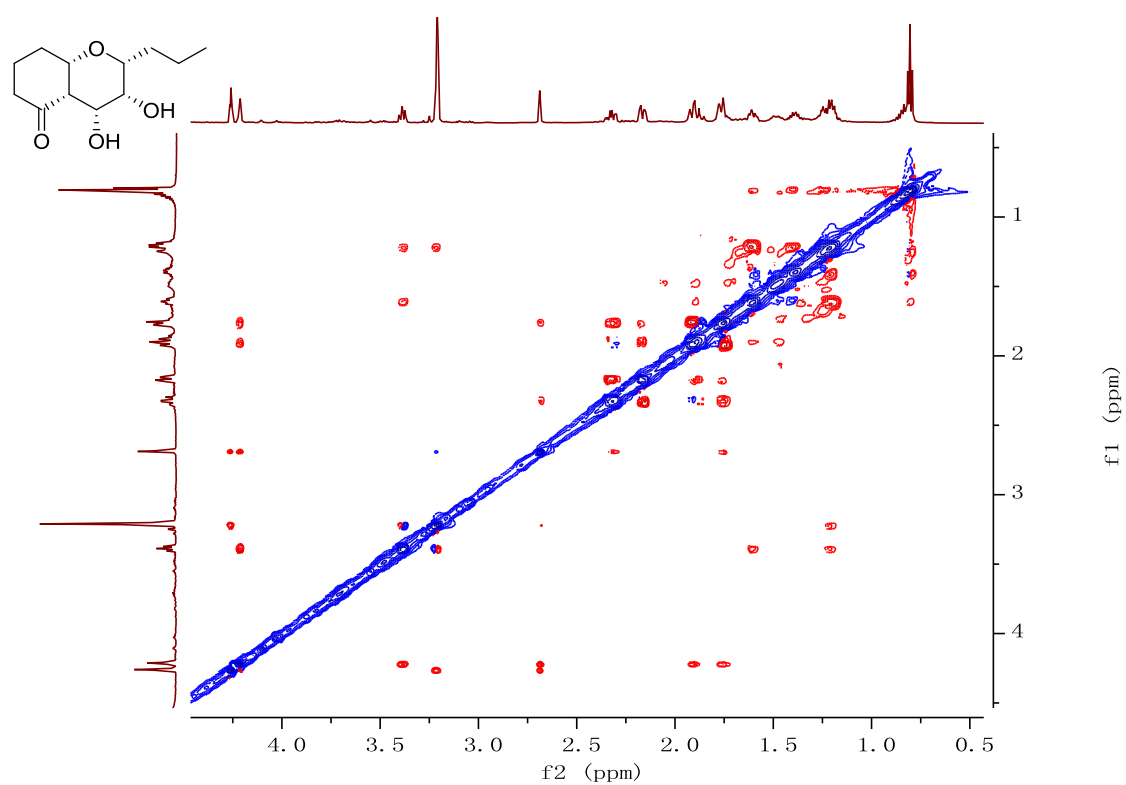

**Fig. S25.** ROESY spectrum of phomretone C (**3**) in methanol- $d_4$  (400 MHz).

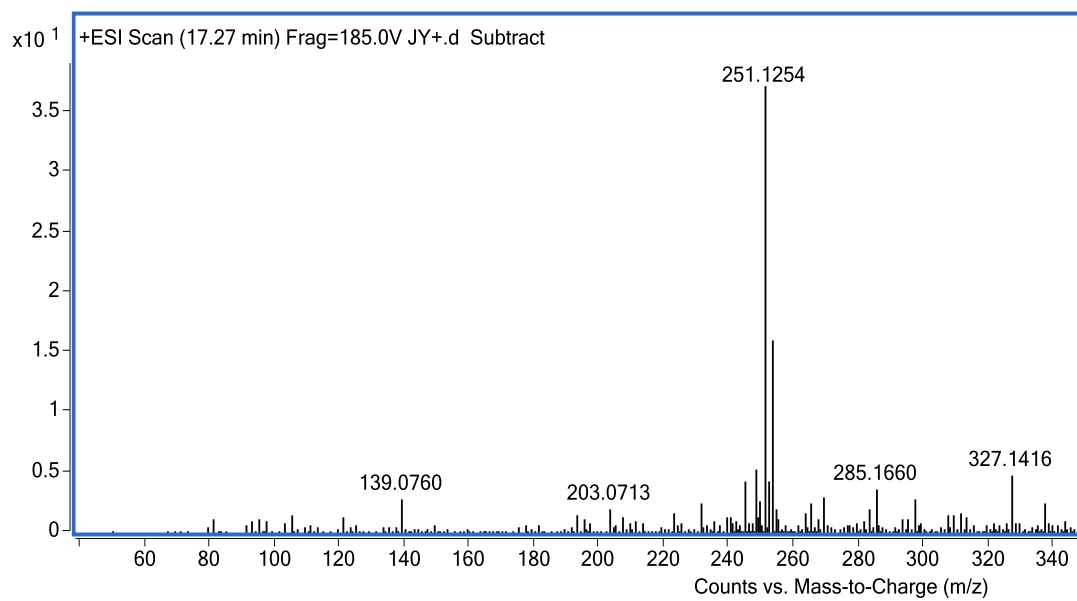

**Fig. S26.** (+)-HRESIMS data of phomretone C (**3**).

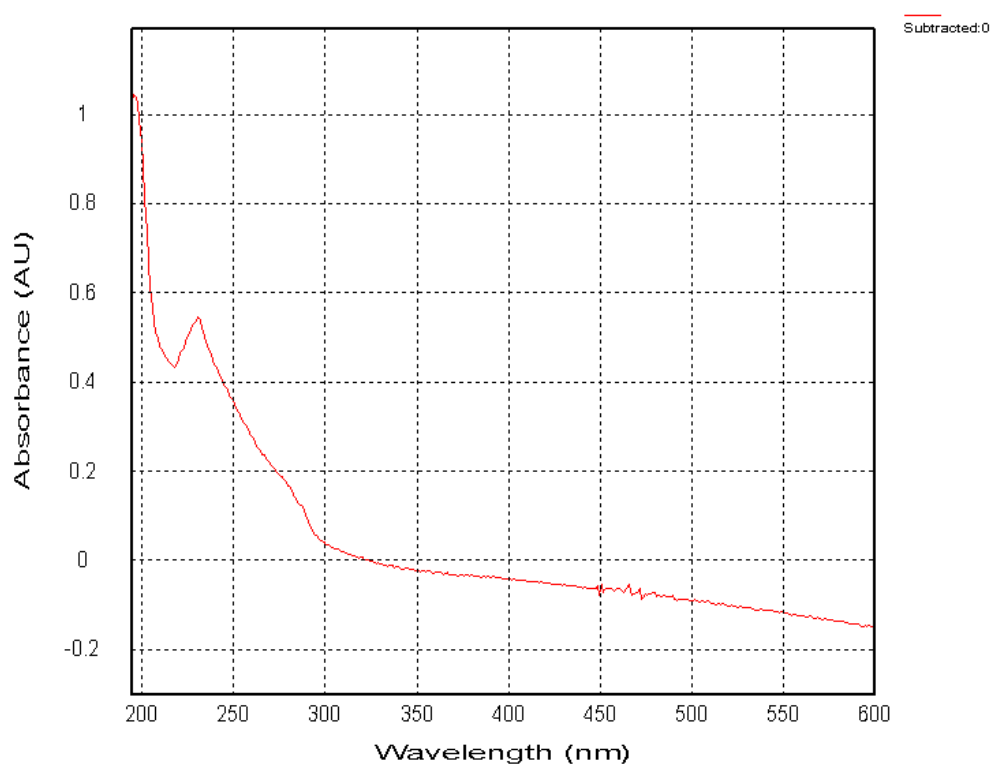

**Fig. S27.** UV absorption spectrum of phomretone C (**3**) in MeOH.

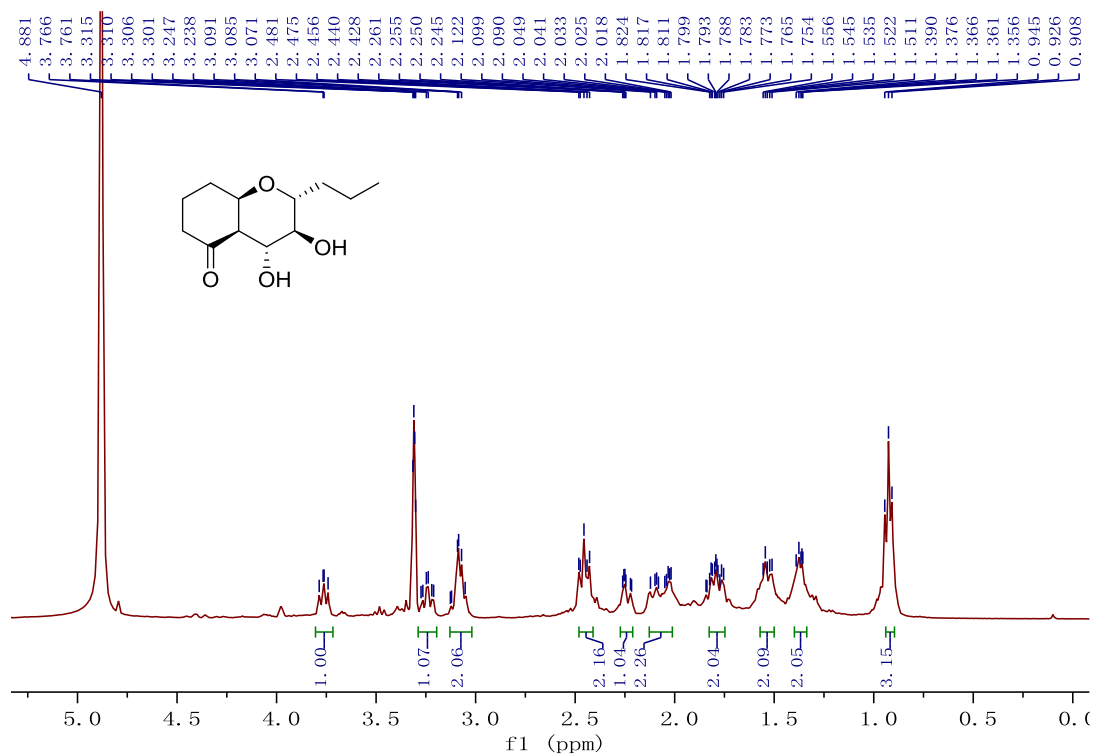

Fig. S28. <sup>1</sup>H NMR spectrum of phomretone D (**4**) in methanol-*d*<sub>4</sub> (400 MHz).

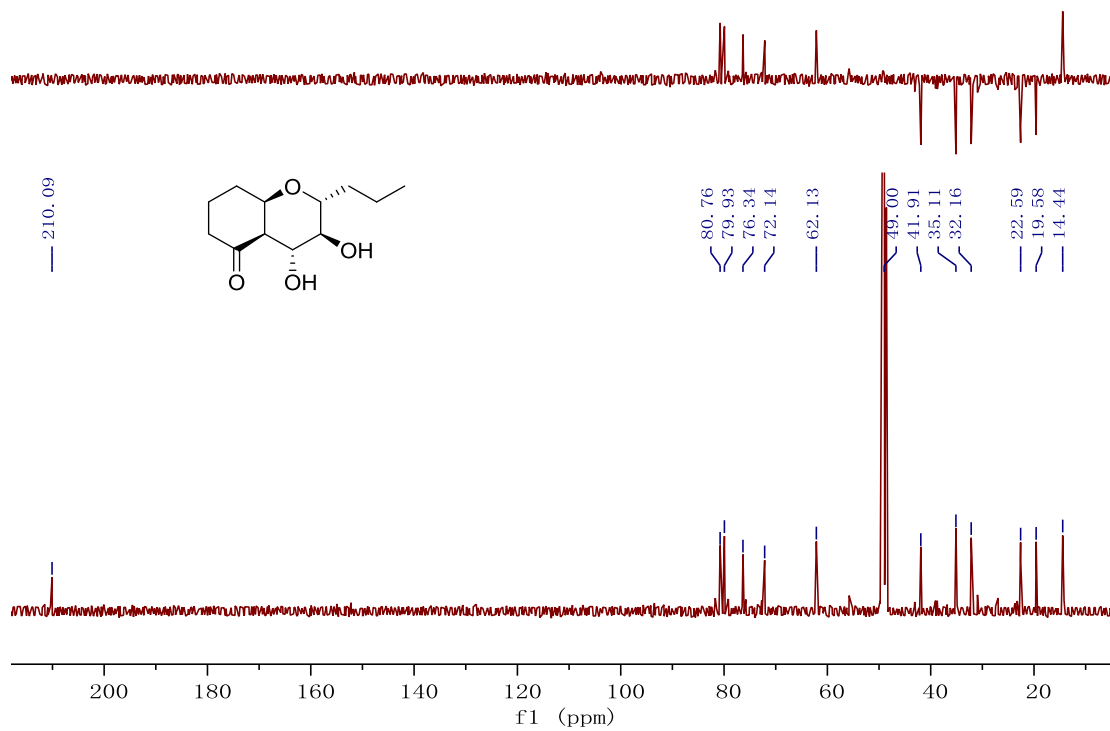

Fig. S29. <sup>13</sup>C NMR and DEPT spectrum of phomretone D (**4**) in methanol-*d*<sub>4</sub> (100 MHz).

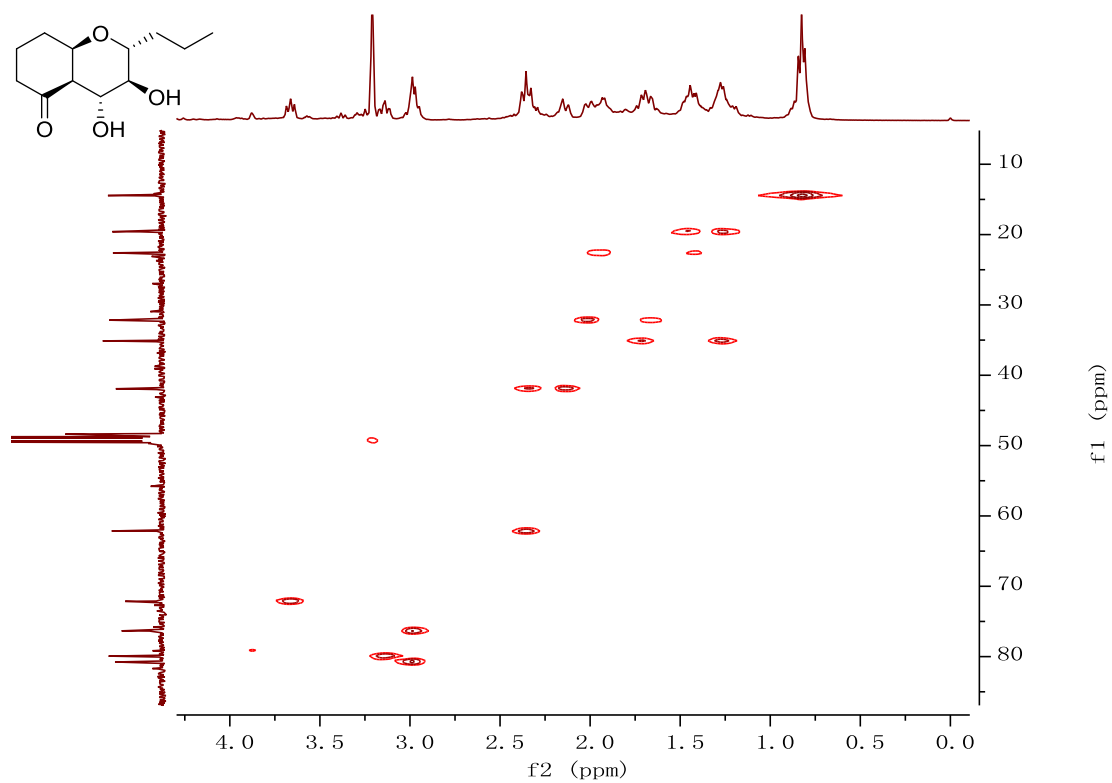

**Fig. S30.** HSQC spectrum of phomretone D (**4**) in methanol- $d_4$  ( $^1\text{H}$ -400 MHz).

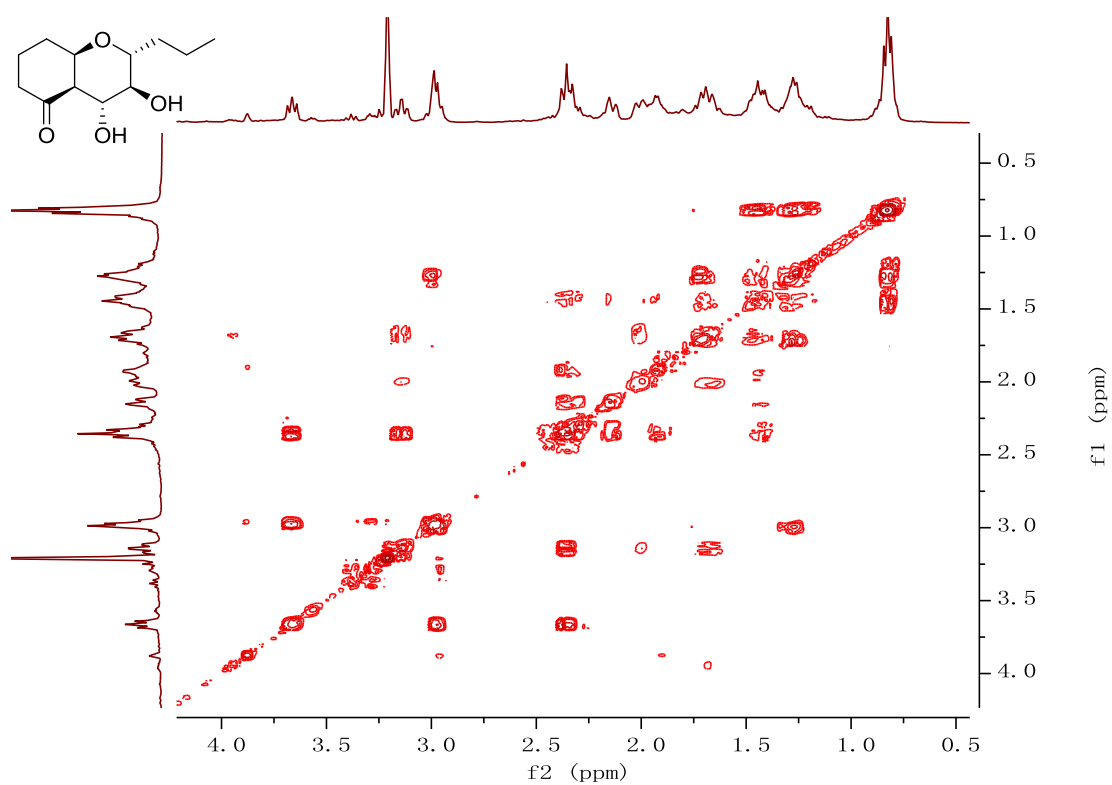

**Fig. S31.**  $^1\text{H}$ - $^1\text{H}$  COSY spectrum of phomretone D (**4**) in methanol- $d_4$  (400 MHz).

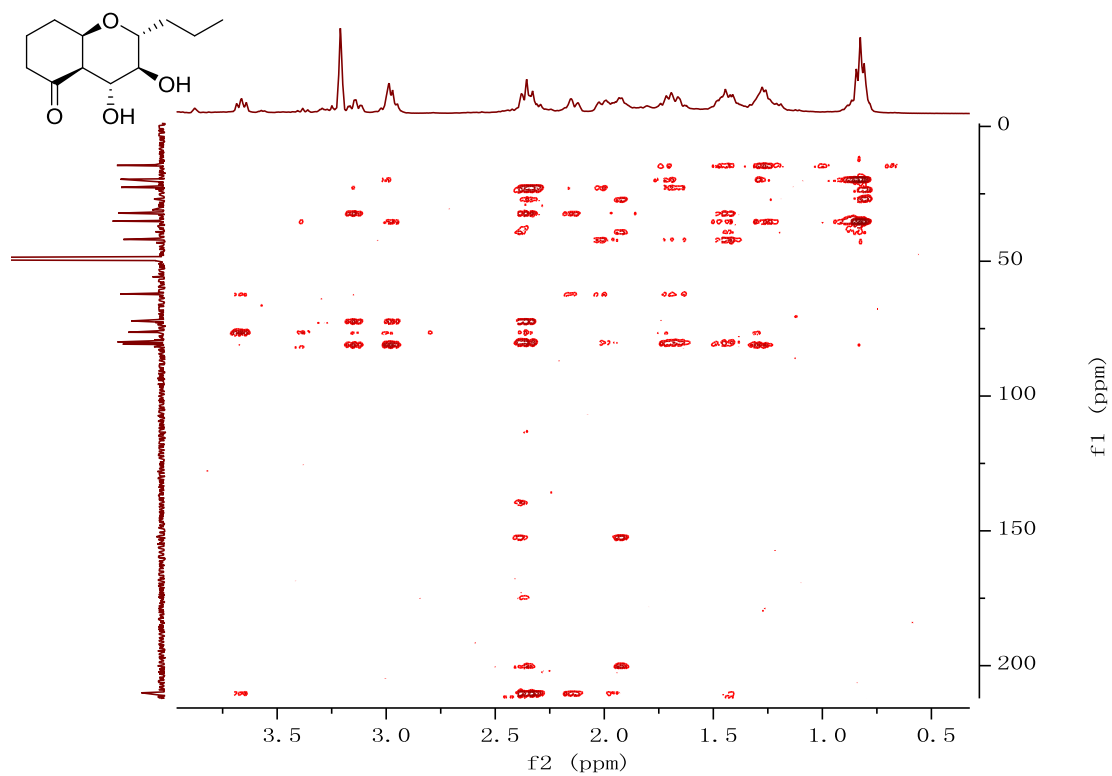

**Fig. S32.** HMBC spectrum of phomretone D (**4**) in methanol- $d_4$  ( $^1\text{H}$ -400 MHz).

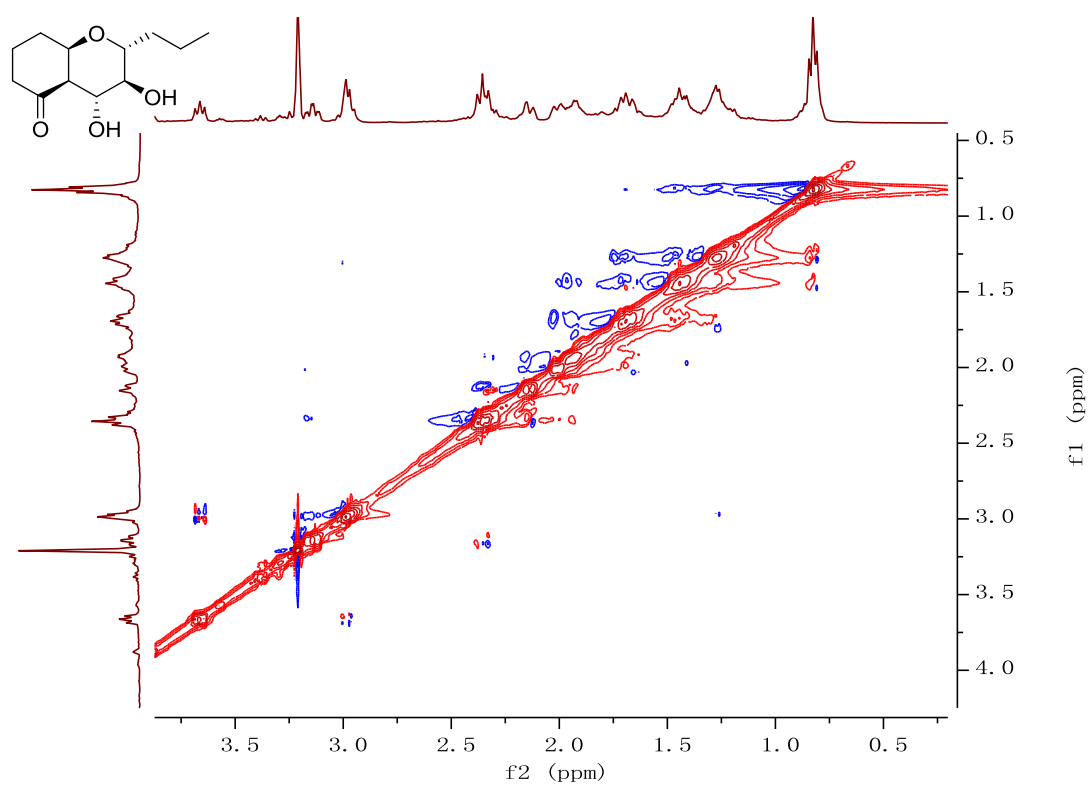

**Fig. S33.** ROESY spectrum of phomretone D (**4**) in methanol- $d_4$  (400 MHz).

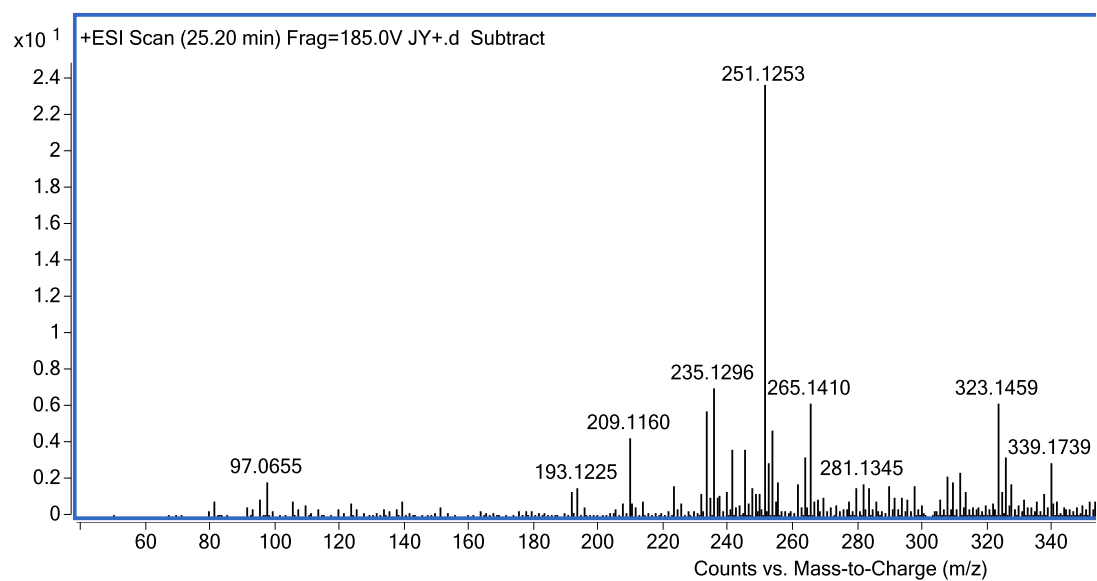

**Fig. S34.** (+)-HRESIMS data of phomretone D (**4**).

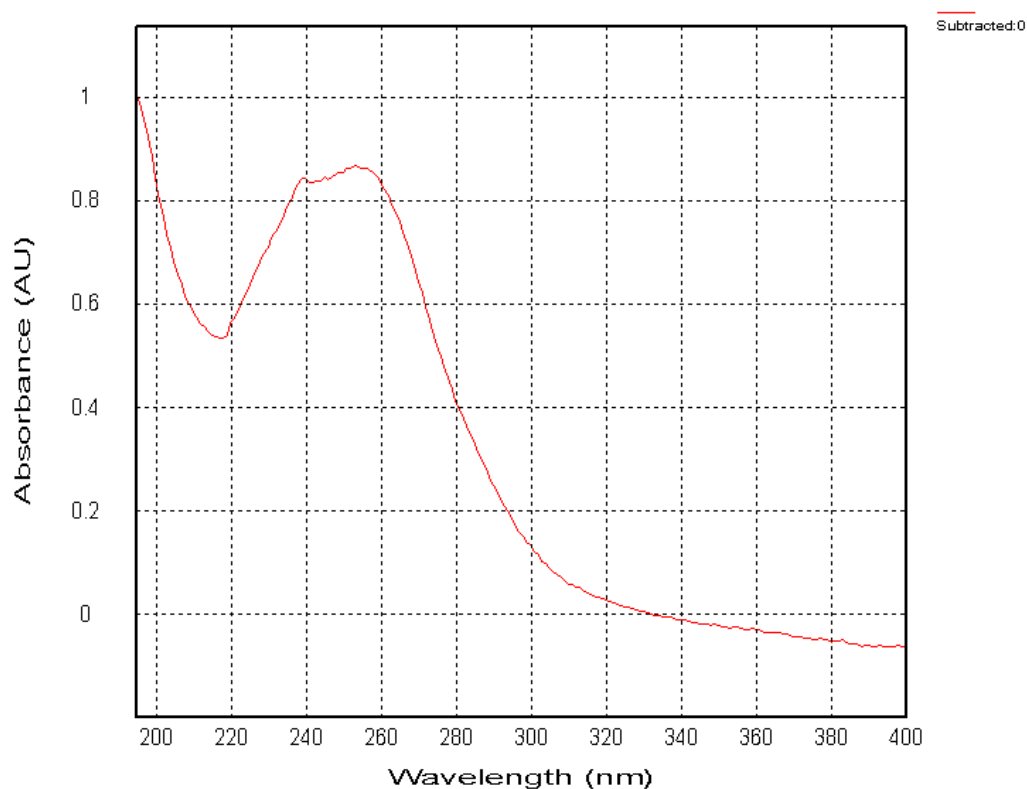

**Fig. S35.** UV absorption spectrum of phomretone D (**4**) in MeOH.

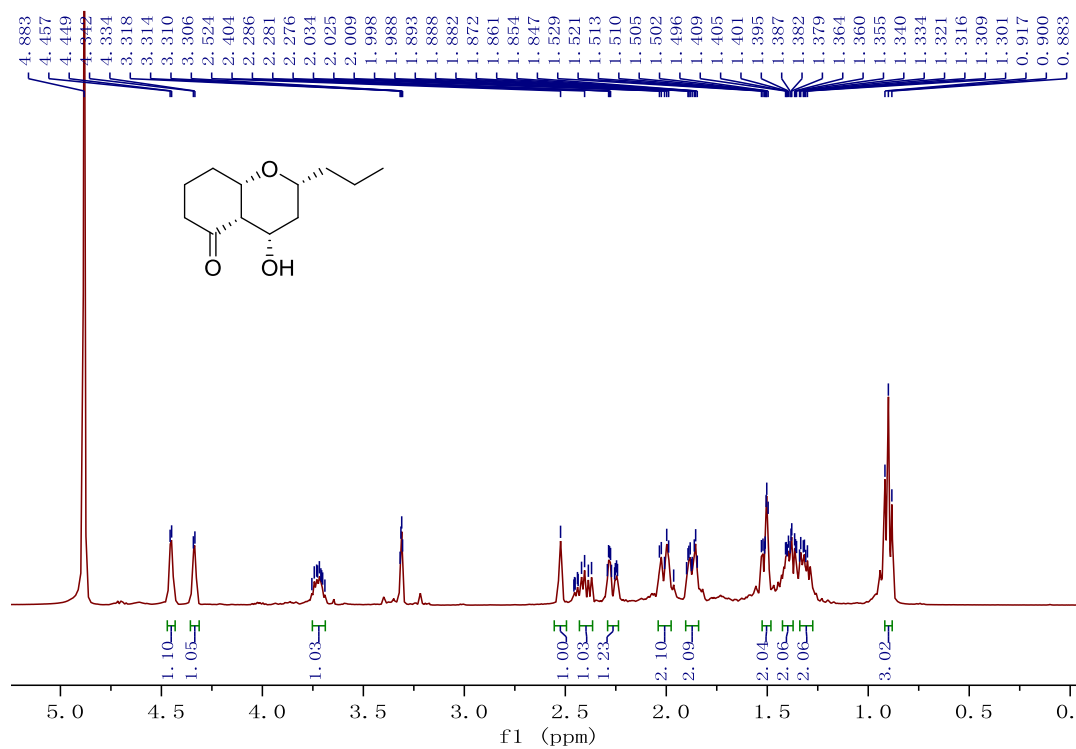

**Fig. S36.** <sup>1</sup>H NMR spectrum of phomretone E (**5**) in methanol-*d*<sub>4</sub> (400 MHz).

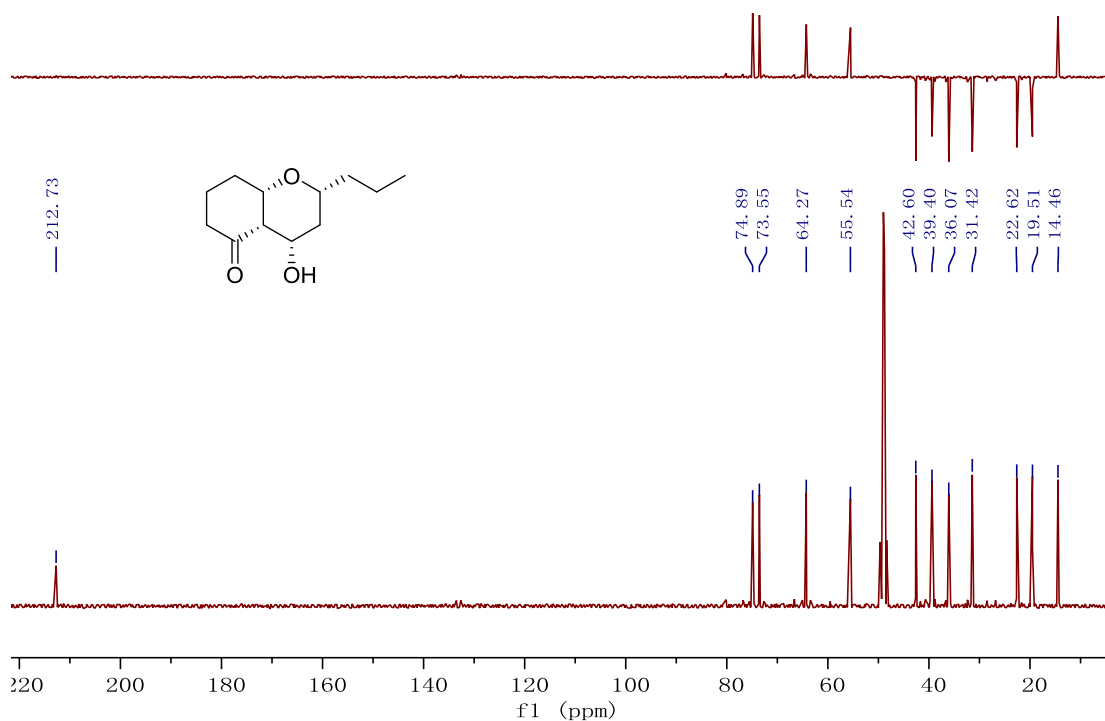

**Fig. S37.** <sup>13</sup>C NMR and DEPT spectrum of phomretone E (**5**) in methanol-*d*<sub>4</sub> (100 MHz).



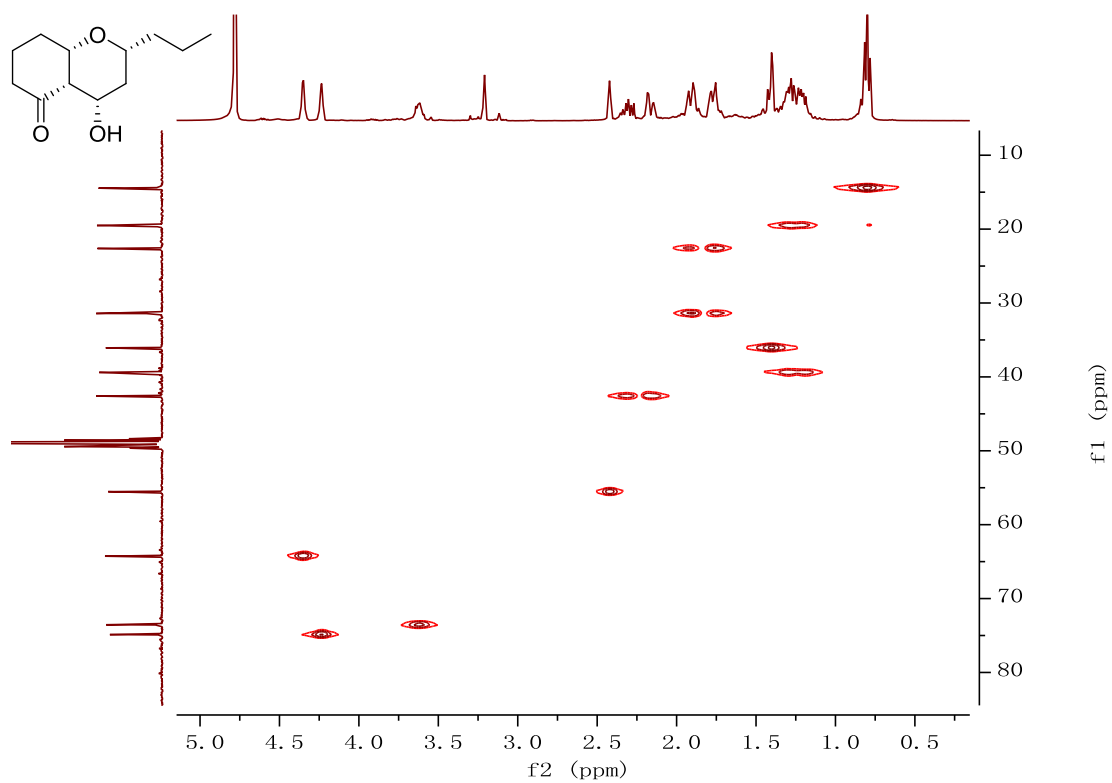

**Fig. S38.** HSQC spectrum of phomretone E (**5**) in methanol- $d_4$  ( $^1\text{H}$ -400 MHz).

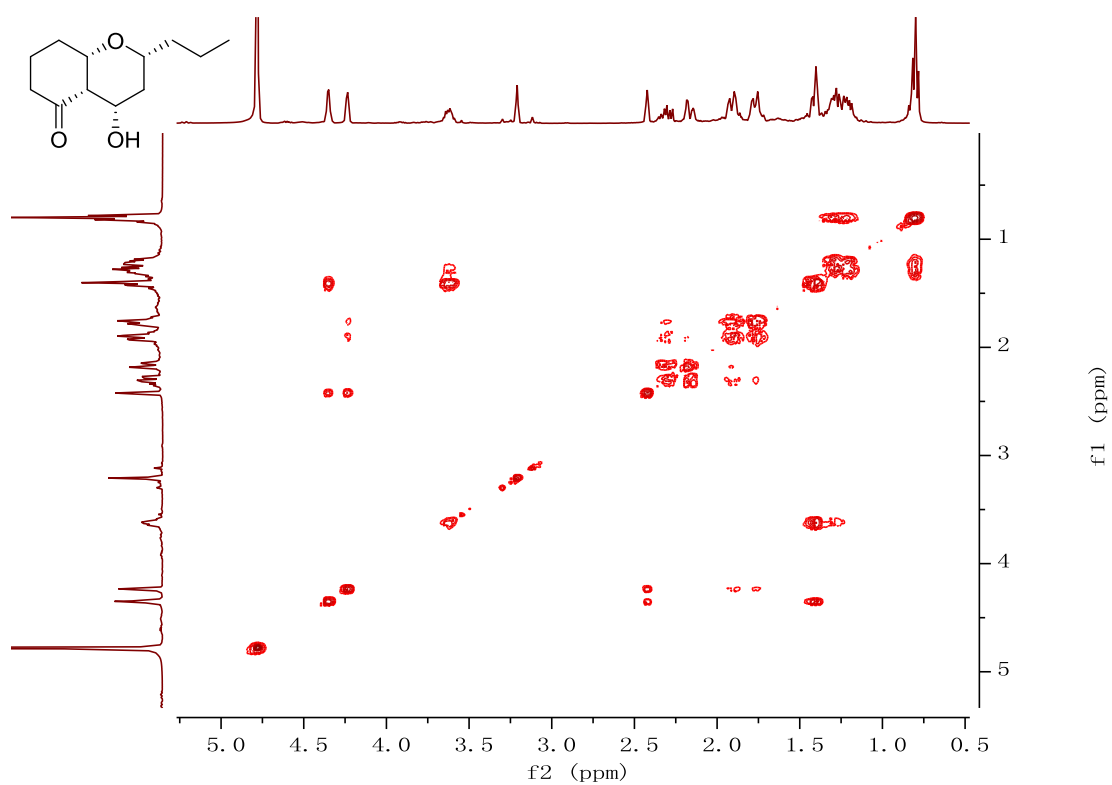

**Fig. S39.**  $^1\text{H}$ - $^1\text{H}$  COSY spectrum of phomretone E (**5**) in methanol- $d_4$  (400 MHz).

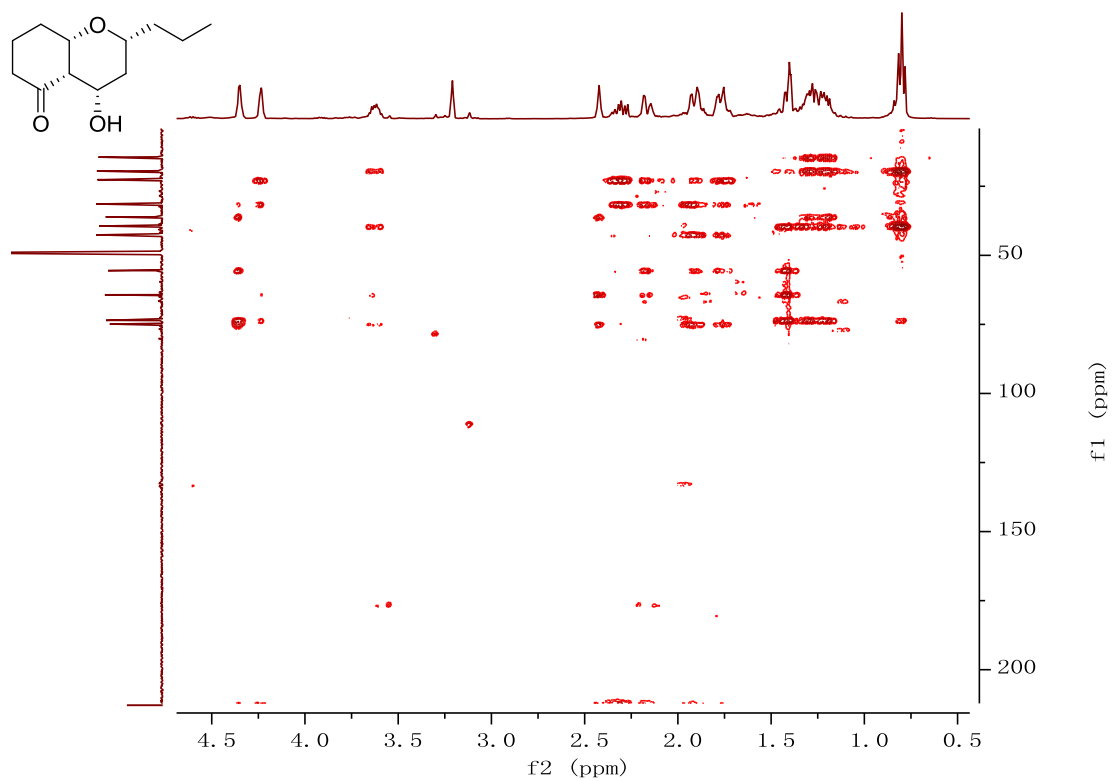

**Fig. S40.** HMBC spectrum of phomretone E (**5**) in methanol- $d_4$  ( $^1\text{H}$ -400 MHz).

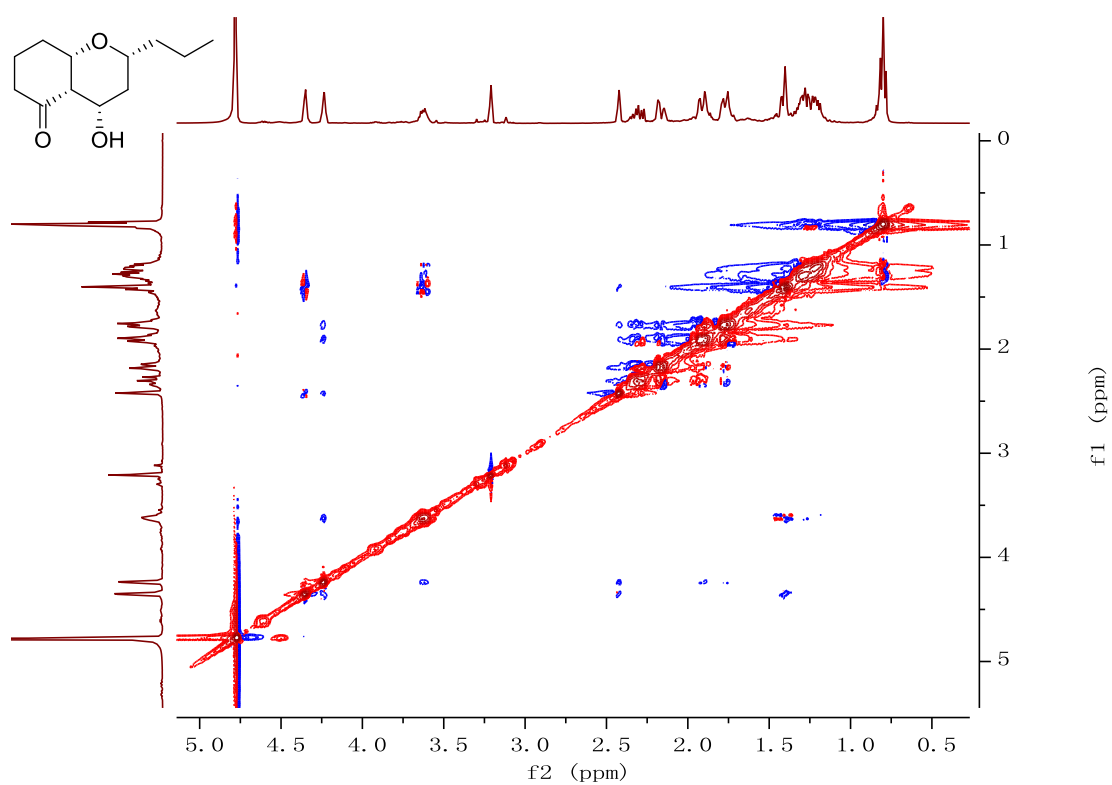

**Fig. S41.** ROESY spectrum of phomretone E (**5**) in methanol- $d_4$  (400 MHz).

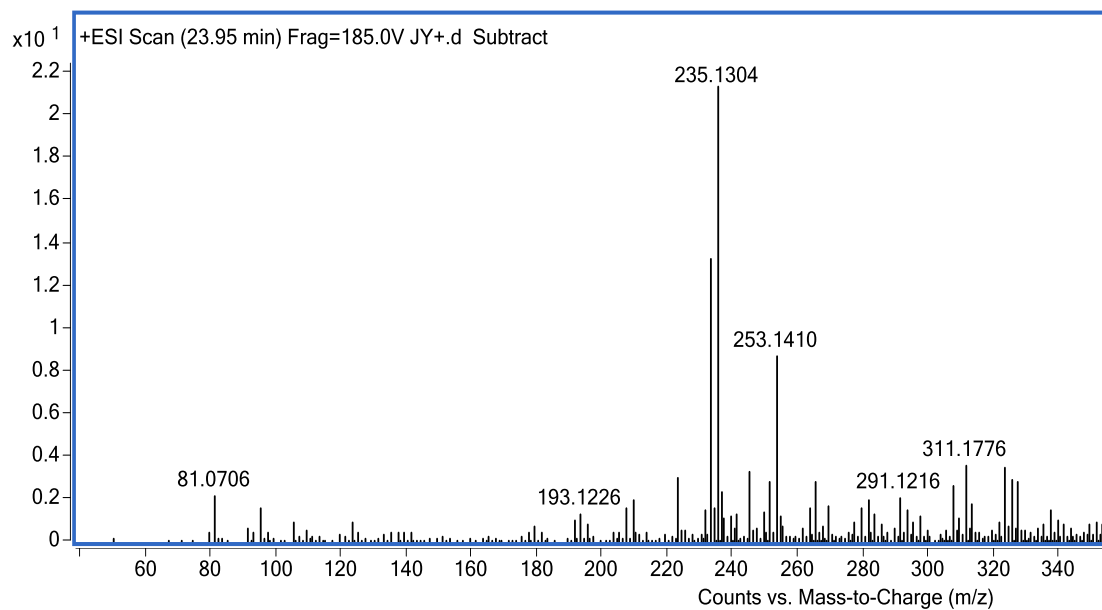

**Fig. S42.** (+)-HRESIMS data of phomretone E (**5**).

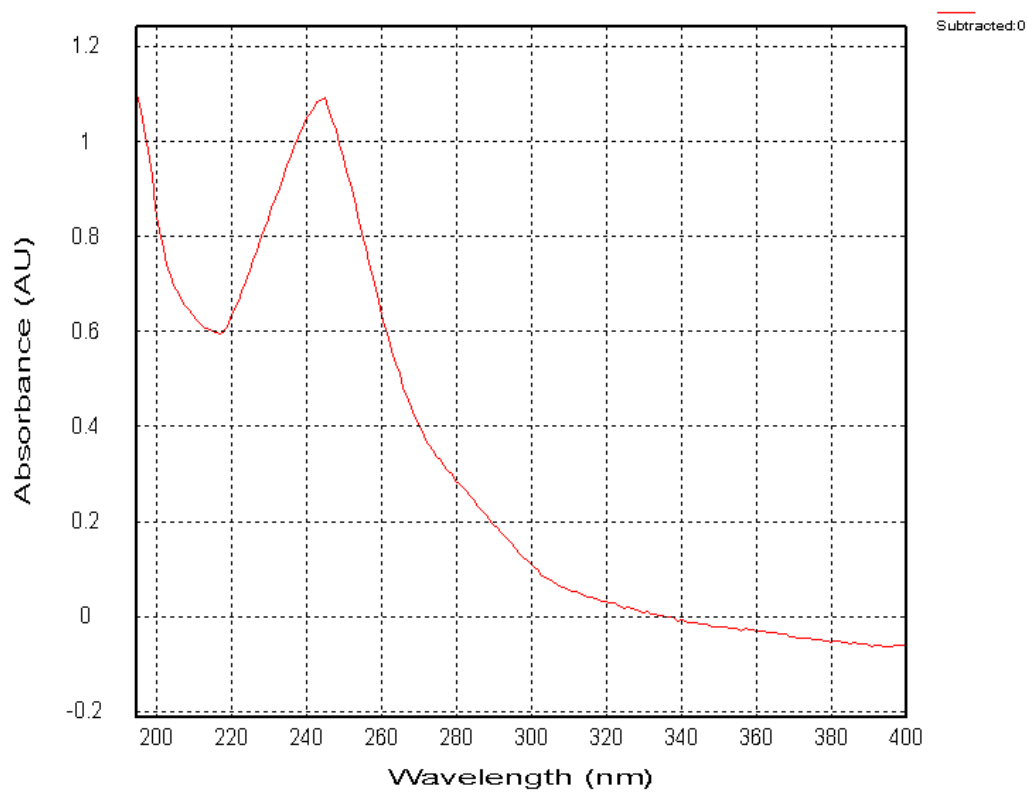

**Fig. S43.** UV absorption spectrum of phomretone E (**5**) in MeOH.

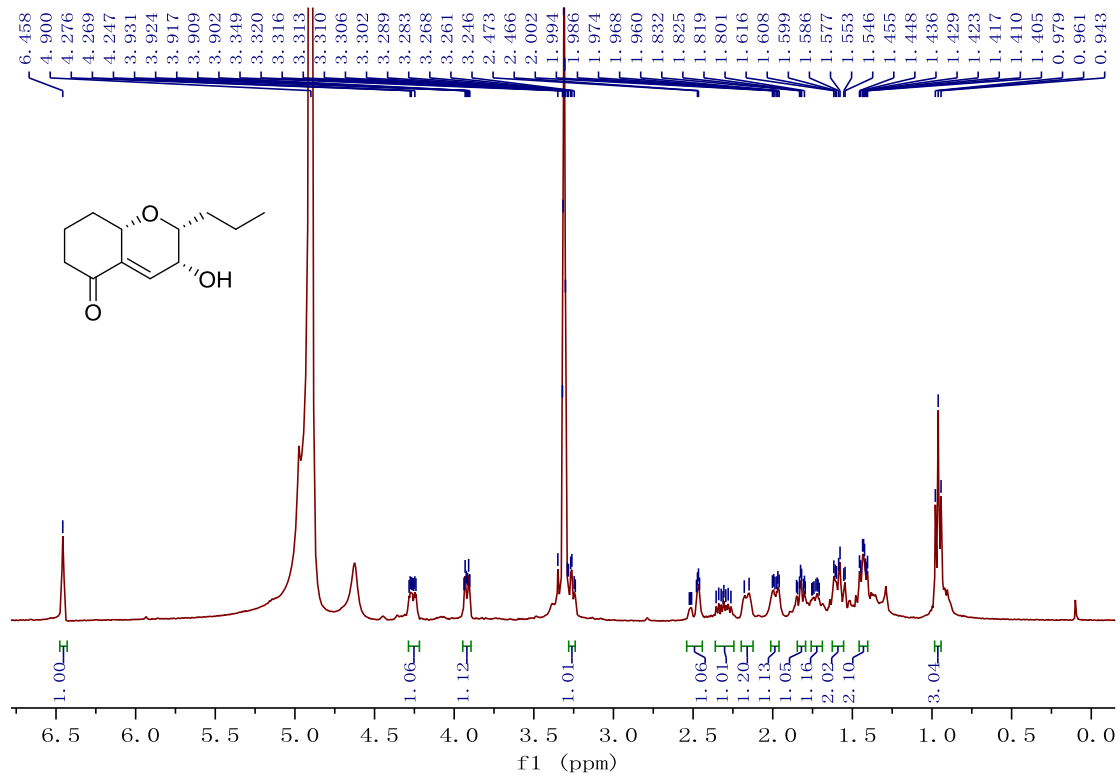

**Fig. S44.** <sup>1</sup>H NMR spectrum of phomretone F (**6**) in methanol-*d*<sub>4</sub> (400 MHz).

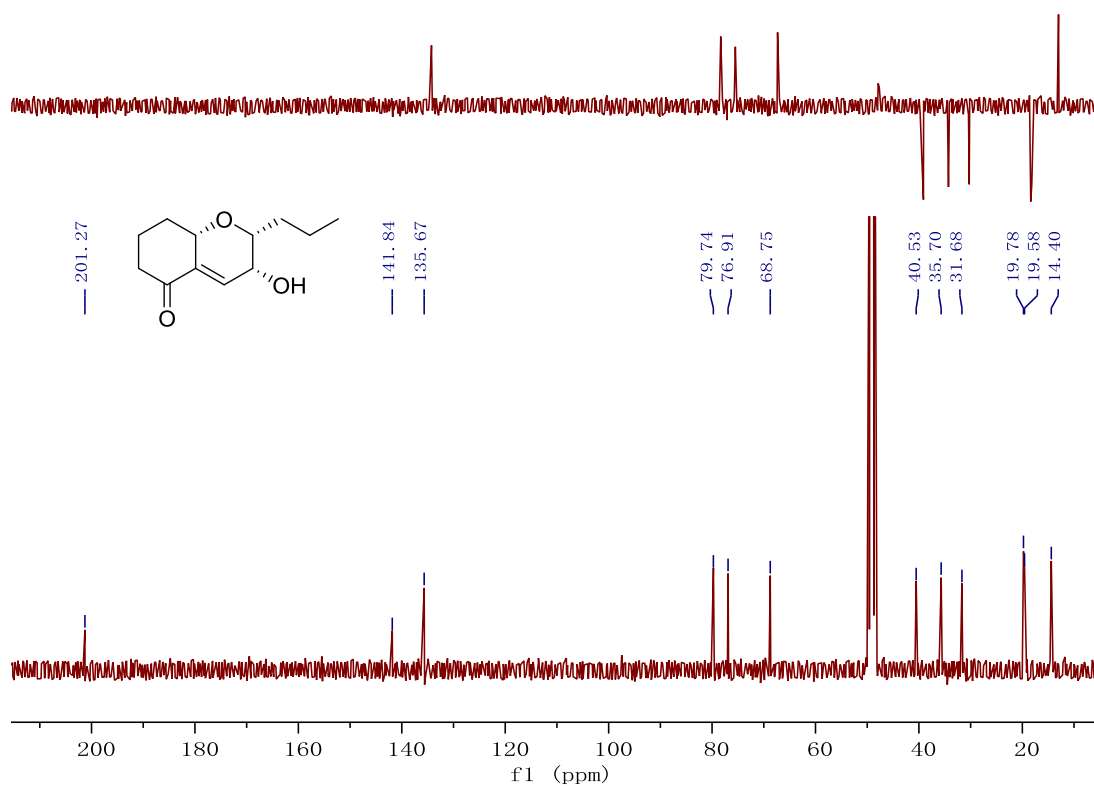

**Fig. S45.** <sup>13</sup>C NMR and DEPT spectrum of phomretone F (**6**) in methanol-*d*<sub>4</sub> (100 MHz).

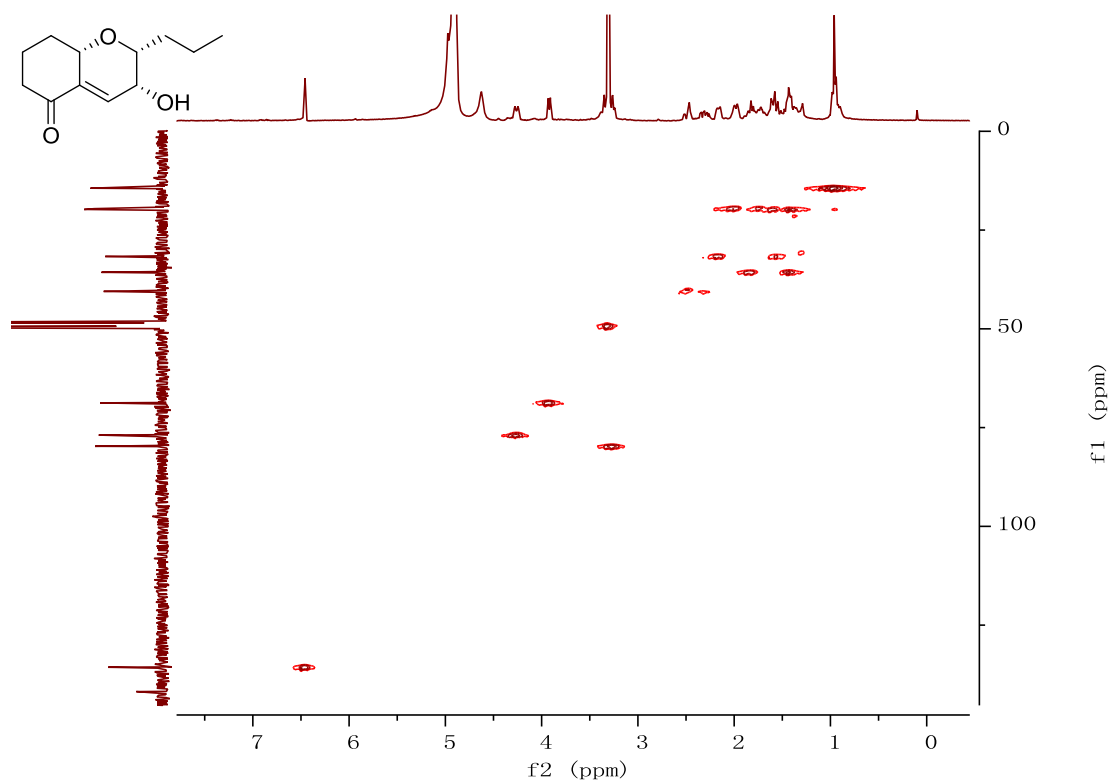

**Fig. S46.** HSQC spectrum of phomretone F (**6**) in methanol- $d_4$  ( $^1\text{H}$ -400 MHz).

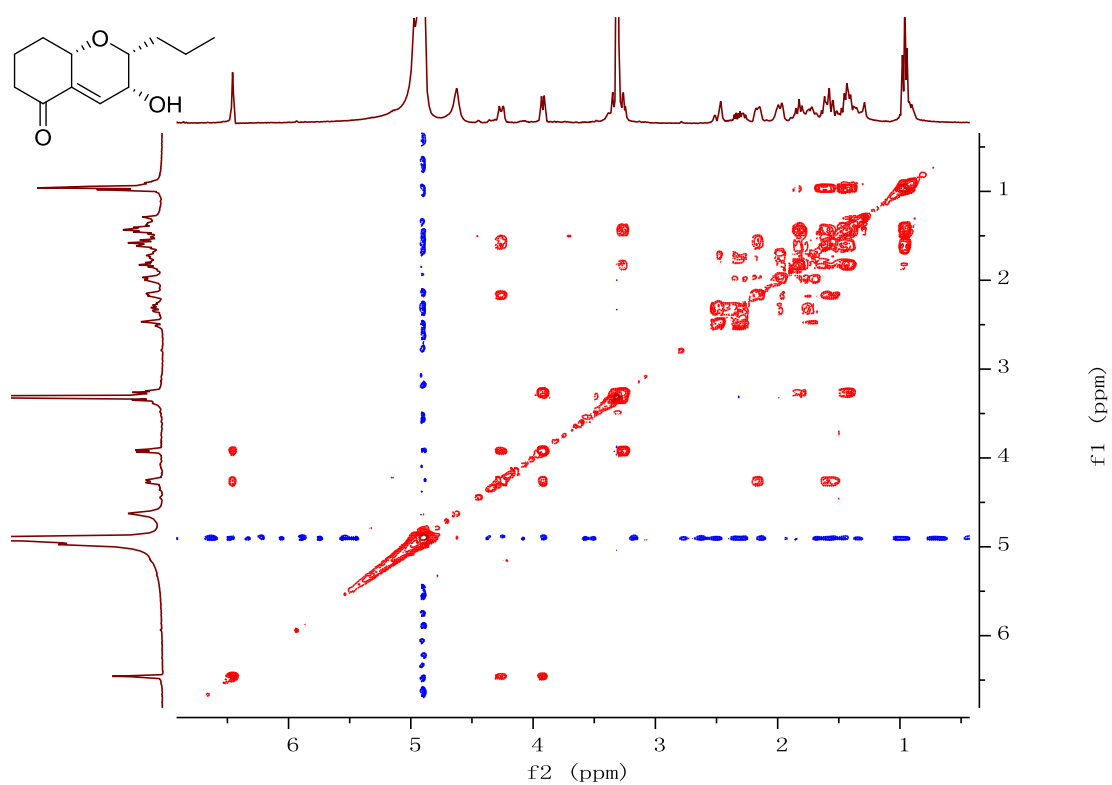

**Fig. S47.**  $^1\text{H}$ - $^1\text{H}$  COSY spectrum of phomretone F (**6**) in methanol- $d_4$  (400 MHz).

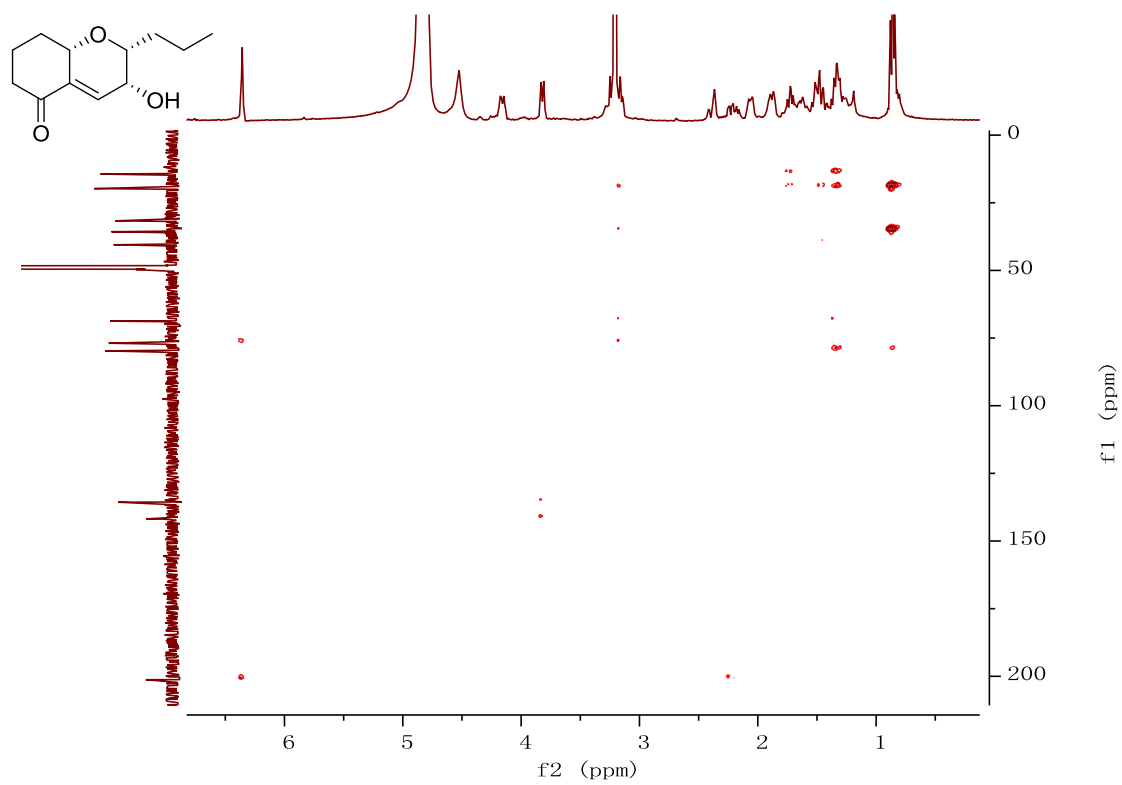

**Fig. S48.** HMBC spectrum of phomretone F (**6**) in methanol- $d_4$  ( $^1\text{H}$ -400 MHz).

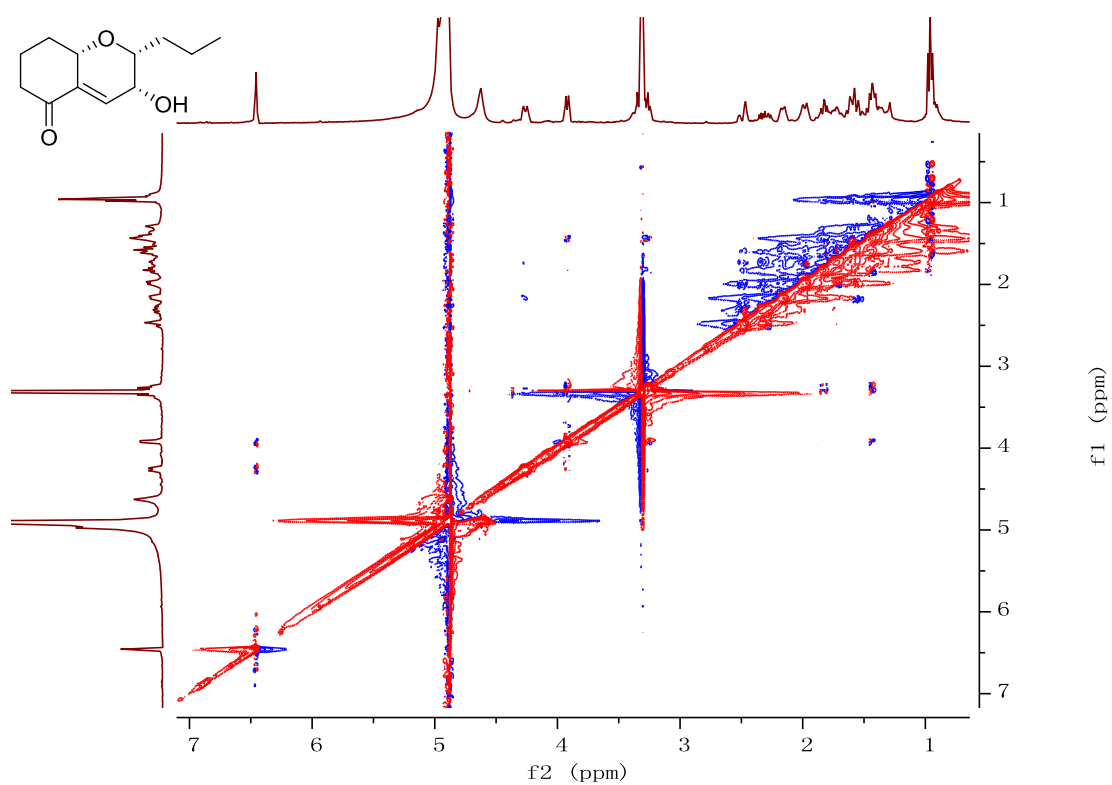

**Fig. S49.** ROESY spectrum of phomretone F (**6**) in methanol- $d_4$  (400 MHz).

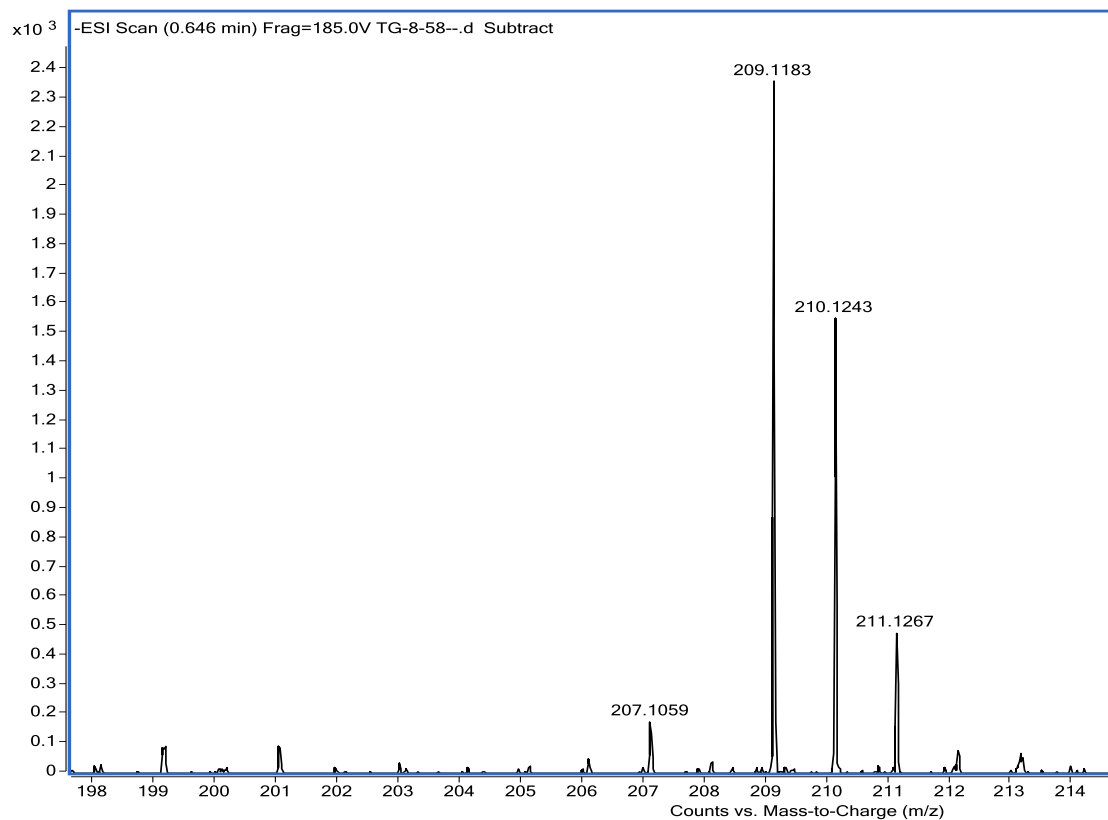

Fig. S50. (+)-HRESIMS data of phomretone F (6).

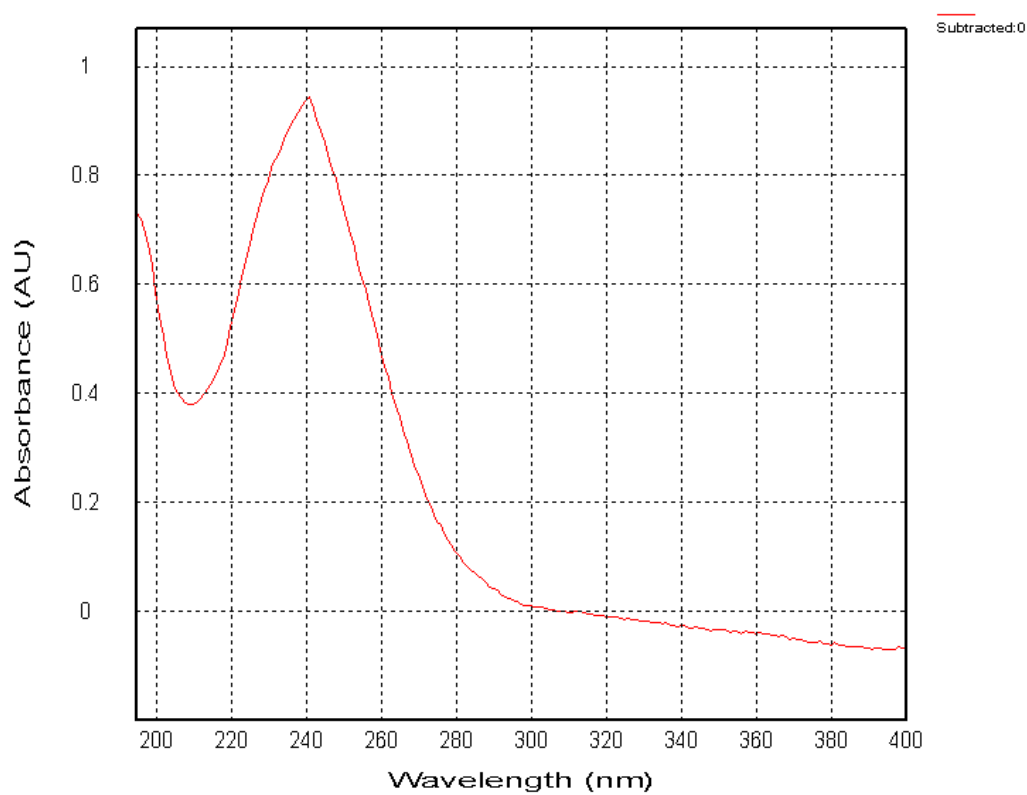

Fig. S51. UV absorption spectrum of phomretone F (6) in MeOH.

## References

- [1] C. Li, A. M. Sarotti, J. Turkson, S. Cao, *Tetrahedron lett.*, 2017, **58**, 2290-2293.
